# Supplementary material for: Chronic intake of high-dose of blueberry leaf extract does not augment the harmful effects of ethanol in rats
Source: PeerJ. 2019 Jun 7;7:e6989. doi: 10.7717/peerj.6989 (PMC6557255; doi:10.7717/peerj.6989)
Supplement: Dataset S1 [file peerj-07-6989-s001.xlsx]

## Sheet: body weight
body weight
		day
	unit: g	0	1	2	3	4	5	6	7	8	9	10	11	12	13	14	15	16	17	18	19	20	21	22	23	24	25	26	27	28	29	30	31	32	33	34	35
NLD	1	292.09	297.98	295.47	289.6	303.85	304	315.12	314.93	325.51	329.13	339.97	342.84	330.64	343	335.13	361.02	367.16	368.73	383.57	384.14	397.12	396.21	410.2	410.85	422.91	425.29	434.28	434.59	441.79	447.76	456.38	455.86	464.15	470.99	472.36	481.54
	2	264.7	266.94	272.16	270.9	280.93	288.07	294.65	297.49	309.63	315.6	322.57	328.32	339.43	342.84	353.47	357.66	362.78	363.21	377.9	383.93	385.75	387.43	398.51	398.26	409.37	411.77	419.91	422.04	429.95	433.26	439.02	443.17	450.27	453.19	461.89	471.02
	3	283.1	289.7	292.7	289.09	306.42	307.84	316.81	320.32	334.25	337.47	346.82	351.97	359.6	360.8	375.13	377.77	383.42	385.02	396.82	396.17	392.2	407.6	418.19	417.87	429.59	431.86	437.84	440.84	447.51	449.75	456.77	460.29	467.76	469.67	474.75	481.53
	4	267.77	269.03	274.76	279.08	285.33	290.51	300.4	307.41	315.16	321.72	330.28	335.45	343.3	348.11	358.87	361.33	369.1	370.55	384.73	382.92	393.84	393.18	404.62	406.84	412.45	414.81	418.32	423.63	430.04	434.46	438.5	445.05	451.19	453.19	459.5	470.06
	5	276.63	285.29	282.49	286.69	303.43	307.46	311.58	313.82	328.08	334.07	339.45	347.04	357.31	360.59	371.23	377.45	382.32	383.77	391.17	393.42	403.97	408.33	414.46	419.42	428.59	432.02	438.39	444.98	447.97	453.04	458.55	462.1	468.3	468.28	476.15	483.62
ALD	1	287.09	278.2	281.44	276.65	283.14	289.83	298.25	297.45	305.85	303.6	306	305.35	308.5	312.89	317.7	318.67	323.07	322.97	330.86	339.08	344.82	346.25	357.11	361.36	368.23	371.93	381.82	382.2	386.77	400.22	405.14	406.99	415.09	416.57	419.1	423.09
	2	265.62	258.27	263.02	260.12	266.7	267.82	273.6	275.35	284.89	279.93	278.72	278.86	277.42	278.71	279.84	280.96	282.04	285.66	289.44	291.79	292.03	296.71	301.75	310.26	313.77	318.04	321.04	325.62	331.47	341.21	343.33	348.94	355.75	361.7	364.26	368.16
	3	274.55	267.98	272.58	264.35	272.67	278.82	288.61	283.76	295.37	290.89	293.7	292.31	297.45	297.94	303.16	310.13	310.75	313.84	318.97	325.66	332.4	341.65	343.24	350.6	356.13	360.63	363.46	371.81	377.41	384.46	392.73	394.48	396.54	403.29	409.71	409.66
	4	281.83	278.71	282.49	281.53	289.72	295.53	303.94	303.04	313.1	305.34	308.26	308.78	307.6	308.99	309.82	312.88	315.68	321.3	321.78	331.33	332.55	337.62	346.41	349.03	352.52	358.09	363.64	368.19	365.46	379.42	386.03	384.87	391.57	398.38	403.89	402.32
	5	279.26	271.93	273.45	273.64	281.79	279.97	281.75	287.51	290.93	289.1	284.87	289.03	290.41	290.81	292.68	292.09	295.3	296.14	301.81	304.13	308.25	315.25	315.51	319.58	307.96	312.76	321.23	329.76	330.22	333.35	338.68	341.73	344.42	353.99	354.23	355.07
NLD + BLEx	1	282.4	292.02	297.15	289.78	306.02	286.84	316.75	322.37	331.31	329.95	340.24	343.87	351.05	349.16	363.87	365.45	379.47	370.64	388.7	383.67	399.16	386.89	409.96	414.53	419.85	416.14	430.99	432.86	441.17	447.02	457.59	453.42	458.01	457.88	466.47	474.24
	2	273.41	275.71	285.46	281.82	291.42	297.33	311.21	317.33	329.28	331.48	336.46	339.3	351.22	348.76	361.73	360.6	370.72	368.4	380.46	376.44	390.97	385.62	401.98	402.26	410.63	407.65	423.35	420.94	430.88	434.58	441.1	446.59	458.52	462	466.73	473.87
	3	265.23	276.3	280.83	278.53	292.59	297.4	311.33	313.97	323.01	326.01	336.45	337.53	348.28	347.56	363.6	362.98	373.62	368.93	379.96	379.51	392.09	387.87	404.68	406.91	417.46	413.46	424.91	428.9	436.63	440.1	449.1	450.29	459.19	462.49	465.68	477.05
	4	290.21	297.17	294.76	291.93	306.5	307.36	310.5	323.04	333.92	334.08	336.12	349.1	356.32	358.94	371.96	366.05	382.04	382.61	398.79	396.47	406.2	405.09	421.18	421.57	426.81	428.14	442.26	444.09	451.48	454.58	461.17	466.09	470.87	474.38	479.99	486.59
	5	278.61	279.75	287.47	292.52	286.86	293.98	304.37	308.33	316.2	312.97	327.17	331.76	339.08	339.55	353.63	356.92	366.23	366.5	375.33	378.57	388.36	391.05	403.57	406.04	414.16	413.93	426.35	429.53	437.57	441.18	448.53	452.45	460.33	463.44	470.79	478.73
ALD + BLEx	1	274.72	268.33	275.17	281.42	280.09	287.7	292.86	286.13	297.22	304.94	299.14	299.11	302.34	302.41	306.56	317.19	314.23	316.13	321.65	329.81	330.19	328.54	338.12	345.26	346.67	351.43	353.31	358.14	368.48	361.78	367.36	374.84	378.65	381.95	376.93	376.2
	2	286.02	282.96	276.45	278.03	279.13	281.58	286.2	284.15	293.86	288.56	288.48	288.27	290.15	291.58	292.76	296.53	298.71	303.47	305.68	313.41	315.7	322.42	328.65	333.8	334.17	342.26	342.27	345.49	356.3	356.4	361.32	366.83	372.71	375.7	378.94	380.92
	3	279.75	274.54	275.31	278.79	280.55	281.55	284.86	284.19	290.72	284.8	285.78	285.91	286.78	291.12	285.49	297.02	288.07	296.58	292.79	298.93	300.34	304.56	310.06	313.32	320.22	329.39	326.76	332.21	335.47	345.36	348.26	351.48	350.58	357.58	365	362.51
	4	266.31	264.86	271.05	272.84	278.22	277.33	275.64	282.12	287.75	293.27	287.99	290.06	290.26	289.15	294.62	299.69	303.02	301.45	306.31	312.87	317.58	324.73	326.08	335.05	343.39	347.4	350.76	356.15	364.4	361.54	366.21	376.45	375.31	382.03	386.43	386.39
	5	280.19	272.65	277.85	269.65	271.87	277.37	282.72	285.46	292.02	288.58	287.4	288.48	290.34	291.22	291.75	293.34	294.98	297.61	299.99	307.81	311.44	314.94	322.79	333.59	334.56	341.31	346.88	353.63	363.33	366.45	369.27	373.22	377.13	381.57	385.79	384.24
	average
		0	1	2	3	4	5	6	7	8	9	10	11	12	13	14	15	16	17	18	19	20	21	22	23	24	25	26	27	28	29	30	31	32	33	34	35
	NLD	276.858	281.788	283.516	283.072	295.992	299.576	307.712	310.794	322.526	327.598	335.818	341.124	346.056	351.068	358.766	367.046	372.956	374.256	386.838	388.116	394.576	398.55	409.196	410.648	420.582	423.15	429.748	433.216	439.452	443.654	449.844	453.294	460.334	463.064	468.93	477.554
	ALD	277.67	271.018	274.596	271.258	278.804	282.394	289.23	289.422	298.028	293.772	294.31	294.866	296.276	297.868	300.64	302.946	305.368	307.982	312.572	318.398	322.01	327.496	332.804	338.166	339.722	344.29	350.238	355.516	358.266	367.732	373.182	375.402	380.674	386.786	390.238	391.66
	NLD + BLEx	277.972	284.19	289.134	286.916	296.678	296.582	310.832	317.008	326.744	326.898	335.288	340.312	349.19	348.794	362.958	362.4	374.416	371.416	384.648	382.932	395.356	391.304	408.274	410.262	417.782	415.864	429.572	431.264	439.546	443.492	451.498	453.768	461.384	464.038	469.932	478.096
	ALD + BLEx	277.398	272.668	275.166	276.146	277.972	281.106	284.456	284.41	292.314	292.03	289.758	290.366	291.974	293.096	294.236	300.754	299.802	303.048	305.284	312.566	315.05	319.038	325.14	332.204	335.802	342.358	343.996	349.124	357.596	358.306	362.484	368.564	370.876	375.766	378.618	378.052
	S.D.
		0	1	2	3	4	5	6	7	8	9	10	11	12	13	14	15	16	17	18	19	20	21	22	23	24	25	26	27	28	29	30	31	32	33	34	35
	NLD	11.1964	13.419	10.4154	8.00023	11.8991	9.54729	9.70431	8.73865	9.97206	8.94697	9.45586	9.37705	12.2397	9.0405	15.8891	9.75102	9.34335	9.65227	7.30441	6.1913	6.68589	9.15857	7.82209	8.61843	9.25378	9.46283	9.84999	10.1882	8.96978	9.14716	10.1529	8.7111	8.91714	9.06448	7.68525	6.46812
	ALD	8.11645	8.41607	7.88253	8.83229	9.09683	10.711	12.2309	10.9958	11.3842	10.6318	12.8821	12.2505	12.9325	13.8402	14.8127	15.8017	16.5395	16.3923	16.6665	19.7439	21.3745	20.9302	23.1746	21.993	27.0557	26.9472	27.5946	25.9582	26.1502	28.9717	30.2078	28.6594	29.5401	27.3805	29.0258	28.7948
	NLD + BLEx	9.39353	9.79369	6.72926	6.34511	9.00689	7.40052	4.39549	6.11917	7.13956	8.31667	4.84356	6.55341	6.3533	6.89294	6.53451	3.74939	6.42209	6.42945	9.25684	8.01101	7.26138	7.96401	7.81131	7.73272	6.12689	7.54595	7.64567	8.39991	7.62504	7.61028	7.9583	7.37072	5.37343	6.16006	5.96274	5.15684
	ALD + BLEx	7.37871	6.87774	2.54041	4.78234	3.52735	4.24613	6.21626	1.53468	3.53257	7.817	5.34242	5.10777	5.98678	5.29254	7.69545	9.46079	9.75457	7.83067	10.644	11.2552	10.7873	9.49383	10.181	11.615	10.2798	8.32166	10.4986	10.6095	13.1232	8.06356	8.47622	10.2241	11.5596	10.5107	8.67277	9.5003

## Sheet: final
	final body weight
		NLD	NLD + BLEx	ALD	ALD + BLEx
		481.54	474.24	423.09	376.2
		471.02	473.87	368.16	380.92
		481.53	477.05	409.66	362.51
		470.06	486.59	402.32	386.39
		483.62	478.73	355.07	384.24
	average	477.554	478.096	391.66	378.052
	s.d.	6.46812	5.15684	28.7948	9.5003
一元配置分散分析法								多重比較検定の結果
								Tukey-Kramer法
										危険率5%	危険率1%		0.05	0.01
	データ数	平均値	不偏分散	標準偏差	標準誤差				平均値の差	棄却値	棄却値	検定統計量	基準点	基準点
NLD	5	477.554	41.8366	6.46812	2.89263			NLD,NLD+BLEx	-0.542	28.4355	36.4881	-0.054533	2.86102	3.67123
NLD+BLEx	5	478.096	26.593	5.15684	2.30621			NLD,ALD	85.894	28.4355	36.4881	8.64217	2.86102	3.67123	**
ALD	5	391.66	829.14	28.7948	12.8774			NLD,ALD+BLEx	99.502	28.4355	36.4881	10.0113	2.86102	3.67123	**
ALD+BLEx	5	378.052	90.2557	9.5003	4.24866			NLD+BLEx,ALD	86.436	28.4355	36.4881	8.6967	2.86102	3.67123	**
								NLD+BLEx,ALD+BLEx	100.044	28.4355	36.4881	10.0659	2.86102	3.67123	**
合計	20	431.34	2506.9	50.069	11.1958			ALD,ALD+BLEx	13.608	28.4355	36.4881	1.36916	2.86102	3.67123
分散分析表
変動要因	偏差平方和	自由度	平均平方	Ｆ値	Ｐ値	Ｆ(0.95)	Ｆ(0.99)
全変動	47631.2	19
群間変動	43679.9	3	14560	58.9576	7.20611e-09	3.23887	5.29221
誤差変動	3951.3	16	246.956

## Sheet: final(ANOVA)
	final body weight
		NLD	ALD
	control	481.54	423.09
		471.02	368.16
		481.53	409.66
		470.06	402.32
		483.62	355.07
	BLEx	474.24	376.2
		473.87	380.92
		477.05	362.51
		486.59	386.39
		478.73	384.24
two-way ANOVA
	data number	average	unbiased vatriance	s.d.	s.e.
control,NLD	5	477.554	41.8366	6.46812	2.89263
control,ALD	5	391.66	829.14	28.7948	12.8774
BLEx,NLD	5	478.096	26.593	5.15684	2.30621
BLEx,ALD	5	378.052	90.2557	9.5003	4.24866
control	10	434.607	2436.48	49.3608	15.6092
BLEx	10	428.074	2832.16	53.218	16.829
NLD	10	477.825	30.4947	5.5222	1.74627
ALD	10	384.856	460.058	21.449	6.78276
total	20	431.34	2506.9	50.069	11.1958
ANOVA table
Variation factors	Sum of squared deviations	Degree of freedom	mean square	F value	P value	Ｆ(0.95)
Total variation	47631.2	19
Line spacing change	213.4	1	213.4	0.864123	0.366401	4.494
Inter-row change	43216.2	1	43216.2	174.995	4.95101e-10	4.494
Interaction	250.278	1	250.278	1.01345	0.32906	4.494
Error variation	3951.3	16	246.956
