# Supplementary material for: Chronic intake of high-dose of blueberry leaf extract does not augment the harmful effects of ethanol in rats
Source: PeerJ. 2019 Jun 7;7:e6989. doi: 10.7717/peerj.6989 (PMC6557255; doi:10.7717/peerj.6989)
Supplement: Dataset S2 [file peerj-07-6989-s002.xlsx]

## Sheet: food intake
food intake
		day0	day1		day2		day3		day4		day5		day6		day7		day8		day9		day10		day11		day12		day13		day14		day15		day16		day17		day18		day19		day20		day21		day22		day23		day24
	unit: g	After replenishment	Before replenishment	After replenishment	Before replenishment	After replenishment	Before replenishment	After replenishment	Before replenishment	After replenishment	Before replenishment	After replenishment	Before replenishment	After replenishment	Before replenishment	After replenishment	Before replenishment	After replenishment	Before replenishment	After replenishment	Before replenishment	After replenishment	Before replenishment	After replenishment	Before replenishment	After replenishment	Before replenishment	After replenishment	Before replenishment	After replenishment	Before replenishment	After replenishment	Before replenishment	After replenishment	Before replenishment	After replenishment	Before replenishment	After replenishment	Before replenishment	After replenishment	Before replenishment	After replenishment	Before replenishment	After replenishment	Before replenishment	After replenishment	Before replenishment	After replenishment	Before replenishment
NLD	1	218	152.1	194.7	133.7	208.7	133.4	238.5	142.7	229.3	154.7	232.8	133.8	230.3	133.7	233.9	155.6	231.6	132.4	233.2	141.6	230.2	133.8	231.4	220.5	231.3	145.2	236	134.1	233.4	134.6	227.4	133.2	233.9	133.8	235.9	138.8	232.9	132.9	235.3	134.1	233.7	133.3	235.9	133.2	233.6	133.1	235.7	133.7
	2	216.7	160.2	193.6	133.2	211.3	132.7	239.3	145.3	232.5	146.4	232.9	158.4	231.4	139.9	235.4	146.5	230.9	133.6	235.8	147.3	231.4	132.9	232.9	133.3	234.2	133.8	236.7	132.7	233	133.7	288.4	133.1	231.5	134.1	236.2	134.3	233.1	133.5	235.6	133.5	232	132.6	237.4	133	232.8	134.5	234.5	133.3
	3	220.4	150	194.4	133	212.3	132.6	237.2	137.7	229.7	132.9	231.8	133.7	231.6	132.8	235.4	132.9	231.3	133.7	237.9	134.2	227.8	130.9	234.5	134.2	229.4	133	236.5	132.8	233.1	134	227.9	132.7	229.2	131.5	239.3	134.4	231.2	133	238.2	134	231.6	133.7	237.6	133.8	232.7	133.6	236.3	133.8
	4	225.8	175.1	193.6	133.7	217.1	139.9	238.5	162.4	230.3	152.8	233.5	144.4	231.8	135.3	235.7	159.6	229.3	135	235	148.2	233.1	134	233.5	132.9	232.5	133.9	236.3	133.4	230.3	132.7	226.9	132.9	230.9	132.4	239	134.3	231.4	132.6	238.2	135.2	232.4	134	240.3	136	233.9	133.6	235.6	134
	5	214.4	147.5	185.9	132.9	221.7	133.3	242.9	134.4	230.4	131.4	235.8	195.8	232.1	133.9	236.6	136.9	231	134.9	238.5	154.8	233.4	137.7	234.1	146	231.5	133.6	237.4	140.7	233.4	134.6	230.4	135.7	231.1	133.7	238.3	153.1	230.8	133.7	237.3	133.1	232.2	133.7	236	144.7	234.2	133	236.9	146.2
ALD	1	209.4	134.2	231.2	134.1	203.7	131.4	233.5	134	225.1	135.9	230.6	133.7	226	133.7	228.5	145.9	228.6	165.2	229.4	177.7	226.7	171.6	231	167.8	226.1	153.8	231	163.5	224.6	147	230.1	163.4	225.4	144.5	233.9	163.8	226.1	140.1	231	151.7	226.6	151.3	230	151.7	225.4	136.7	230.8	153.6
	2	206.2	144.7	223.4	132.9	207.6	133.7	232.2	132.8	227.6	158.1	231	155.4	227.7	134.5	230.7	151.8	228.9	172.5	228.9	190.7	266.5	172.8	227.5	181.3	224.5	167.7	232.1	182.8	227.5	165	233.3	182	225.3	157.3	232	174.8	228.5	161.1	232.7	169.8	228.4	159.4	231.6	167.6	229.5	145.7	231.3	162.3
	3	207.8	134.3	224.2	134.3	209.3	134	236.9	134.8	226.9	142.4	231.6	139.6	225.7	133.6	229	139.3	227.7	162.9	232.7	185.2	226	166	231.6	171.8	228.8	168.2	232.6	167.1	228.4	148.8	232	169.3	228.7	151.3	230.3	161.7	226.2	145.5	231.6	152.1	226.9	137	231.5	160.9	227.6	137.2	231.3	151.2
	4	209.1	133.5	224.2	133.7	213	132.9	234.2	133.1	228.6	147.8	232.2	142.9	227.1	133.3	231.9	145.7	226.2	175.3	231.2	185.4	224.3	166.6	231.8	181.4	226.7	166.9	232.8	183.7	227.2	154.9	233.5	173.4	228.6	164.9	233.1	172.9	227.6	154.4	228.3	159.5	228.6	151.4	231.5	159.8	230	154.4	233.4	164.4
	5	210.6	134.4	229	135.9	214.3	132.8	237.2	133.3	228.1	166.9	232.8	173.1	229.5	149.6	230.9	165.1	227.4	188.7	232.1	197.3	227.7	180.8	232.3	184.6	225.5	171.9	233.1	187.2	226.9	170.1	232.5	178.8	228.8	169.3	234.2	177.1	228.3	162.3	235.9	172.7	229.8	159	234.9	175.5	227.6	157.1	234.3	214.5
NLD + BLEx	1	199.6	134	203.4	134.6	192.5	134	237	145.8	230.2	134.4	234.7	139.1	232.8	133.8	235.1	138.2	232.3	136.6	234.4	139.7	232.4	133.6	233.9	134.1	228.6	132.3	235.3	132.9	230.3	133.7	237.6	134.2	227.5	132.4	236.5	133.1	231	133.9	237.5	132.2	230.7	132.6	236	132.4	230.1	132.6	233.7	135.9
	2	203	151.4	200.4	134.9	194	134.9	239.4	158.5	228.3	137.6	234.8	141.6	231	132.9	234.6	134.5	231.1	146.4	233.4	144.5	228.5	132.5	233	132.5	229.5	132.8	236.6	132.3	231.1	133.6	237.5	134.1	230.6	132.6	237.4	135.3	231.5	134.2	237.6	133.1	230	133	238.6	138.2	234.2	133.9	234	132.2
	3	200.3	132.1	200.6	134	194	131.5	237.1	140.3	230	133	236.3	135.1	230.2	133.5	235.5	133.6	230.6	132.6	237.4	141.1	230.2	133.2	236	133.7	227.3	132.5	238.2	133.5	227.9	130.7	239.1	139.8	228.2	133.1	238.4	147.3	228.8	132	238.4	138.8	230.5	133.5	237.7	138.4	232.9	133.9	237.5	135.7
	4	205.7	136.7	201.6	133.8	201.5	133.5	239.9	134	231.5	134.1	237.1	133.8	229.2	131	235.2	133.4	230.1	133.1	235.1	133.1	229.5	133.8	232.4	132.6	232	133.6	239.1	134.1	232	133.6	237.2	132.4	230.4	133.6	237.8	132.2	232.5	132.8	236.2	133.4	232.9	134.2	239.1	133.8	228.2	131.2	235.4	133.3
	5	207	146.1	204.3	138.8	205.2	134.5	241.3	205.5	231.8	139.1	238.2	140.9	236.5	140.1	225.2	133.5	230.9	137.5	236.7	145.5	234.8	140.3	234.7	143	230.9	134.1	238	143.6	232.2	134.2	238	141.1	231.1	133.9	240.1	150	232.7	134.5	237.8	134.6	233.2	133.7	238.2	133.6	229.9	131.6	235.7	137.7
ALD + BLEx	1	183.8	132.9	216.1	133.9	212.8	132.8	224.6	133.4	222	139	232	142.9	224.2	131.3	229.2	153.1	227.2	157.9	229.2	186.3	227.5	168.8	230.9	173.1	224.5	161.4	228	170.3	225.8	150.6	231.6	175.5	226.5	152.6	229.5	169.5	226.1	139.9	232.1	166	227.1	160.4	229.5	153.9	226.4	148.7	229	154.3
	2	203.2	137.3	215.6	133	200.8	134.1	226.5	133.6	225.3	154.8	231.8	159.1	227.5	133.4	229.4	164.4	229.6	183	229.2	190.8	226	178.9	229.1	181.9	226.3	173.9	231.4	183.1	226.8	168.6	233	174.8	226.8	164.6	232.3	175.9	224.8	148.1	232.3	166.9	225	165.5	229.8	156.2	229.2	157.5	228.5	157.3
	3	194	133.2	217.3	132.2	197.6	132.8	227	131.8	226.8	164.2	234.9	162.9	230.3	133.3	230.9	166.7	227.7	185.6	233.3	193.3	226.6	177	230.9	182.5	226	167.2	231.9	190.4	228.4	167	229.5	184.5	227.9	157.8	230.1	183.5	228.4	157.2	229.8	172.7	225.8	150	233.1	168.4	228.3	156.6	234.1	166.1
	4	203	133.2	219	132.1	195.7	134	230.6	132.2	224.4	157.1	233.5	167.4	227.3	134.5	233.9	166.8	225.5	171.4	228.6	187.8	226.3	173.3	230.7	180.3	226.9	167.4	231	173.7	226.3	160.8	230.8	166.7	227	165.1	232.5	174	228.4	151.2	233.6	160.3	229	157.7	232.4	160.9	228.9	145	234.3	159.6
	5	210.2	141.7	221.2	133	181.1	134.4	215.3	134.4	228.6	154.9	233.3	155.6	226	144.8	233.8	162.9	228.6	180.8	232.1	183.4	226.6	177.2	234	179.4	226.8	167.6	233.8	182.3	229.5	165.9	232.3	169.1	228.8	166	233.9	174.3	230.7	156.1	235.1	164.3	228.7	159.2	231.1	157.9	228.2	144.8	232.5	155.4
	day	0	1	2	3	4	5	6	7	8	9	10	11	12	13	14	15	16	17	18	19	20	21	22	23	24	25	26	27	28	29	30	31	32	33	34	35	total	average
NLD	1	0	65.9	61	75.3	95.8	74.6	99	96.6	78.3	99.2	91.6	96.4	10.9	86.1	101.9	98.8	94.2	100.1	97.1	100	101.2	100.4	102.7	100.5	102	99.2	105.6	117.3	102.2	99.9	103.4	98.3	98.7	93.8	87	103.4	3238.4	92.5257
	2	0	56.5	60.4	78.6	94	86.1	74.5	91.5	88.9	97.3	88.5	98.5	99.6	100.4	104	99.3	155.3	97.4	101.9	99.6	102.1	99.4	104.4	98.3	101.2	99.4	104.3	98	102.3	99.6	101.8	99.9	100.7	98.9	103.2	105.3	3391.1	96.8886
	3	0	70.4	61.4	79.7	99.5	96.8	98.1	98.8	102.5	97.6	103.7	96.9	100.3	96.4	103.7	99.1	95.2	97.7	104.9	98.2	104.2	97.9	103.8	99.1	102.5	98.5	103.6	100	103	99.1	102.2	99.9	101	99.9	103.4	105.2	3424.2	97.8343
	4	0	50.7	59.9	77.2	76.1	77.5	89.1	96.5	76.1	94.3	86.8	99.1	100.6	98.6	102.9	97.6	94	98.5	104.7	98.8	103	98.4	104.3	100.3	101.6	98.7	105.6	101	104.1	99.1	104	100.9	99.9	98.7	102.7	104.8	3306.1	94.46
	5	0	66.9	53	88.4	108.5	99	40	98.2	99.7	96.1	83.7	95.7	88.1	97.9	96.7	98.8	94.7	97.4	85.2	97.1	104.2	98.5	91.3	101.2	90.7	100.1	95.8	93.6	85.9	93.8	100.6	99.2	94.3	94	101.1	104.6	3234	92.4
ALD	1	0	75.2	97.1	72.3	99.5	89.2	96.9	92.3	82.6	63.4	51.7	55.1	63.2	72.3	67.5	77.6	66.7	80.9	70.1	86	79.3	75.3	78.3	88.7	77.2	83.9	82.6	82.9	81.4	64	86.5	79.9	92.7	80.6	84.8	77.6	2755.3	78.7229
	2	0	61.5	90.5	73.9	99.4	69.5	75.6	93.2	78.9	56.4	38.2	93.7	46.2	56.8	49.3	62.5	51.3	68	57.2	67.4	62.9	69	64	83.8	69	75.2	72.8	84.1	76.9	86.6	75.3	80.5	81.6	80.4	79.6	77.2	2508.4	71.6686
	3	0	73.5	89.9	75.3	102.1	84.5	92	92.1	89.7	64.8	47.5	60	59.8	60.6	65.5	79.6	62.7	77.4	68.6	80.7	79.5	89.9	70.6	90.4	80.1	87.2	75.2	93.1	85.4	84.9	87.2	83.2	81.3	81.7	82.2	72.7	2750.9	78.5971
	4	0	75.6	90.5	80.1	101.1	80.8	89.3	93.8	86.2	50.9	45.8	57.7	50.4	59.8	49.1	72.3	60.1	63.7	60.2	73.2	68.8	77.2	71.7	75.6	69	79.4	74.3	79.9	75.5	77.9	83	75.1	80.6	85.2	80.8	70.2	2564.8	73.28
	5	0	76.2	93.1	81.5	103.9	61.2	59.7	79.9	65.8	38.7	34.8	46.9	47.7	53.6	45.9	56.8	53.7	59.5	57.1	66	63.2	70.8	59.4	70.5	19.8	63.5	62.9	69.5	57.5	64.8	67.8	67.5	69.3	76.1	64.5	60.9	2190	62.5714
NLD + BLEx	1	0	65.6	68.8	58.5	91.2	95.8	95.6	99	96.9	95.7	94.7	98.8	99.8	96.3	102.4	96.6	103.4	95.1	103.4	97.1	105.3	98.1	103.6	97.5	97.8	95.9	100.7	96.8	102.4	94.6	94.2	97.6	102.4	99.1	99.7	103.5	3343.9	95.54
	2	0	51.6	65.5	59.1	80.9	90.7	93.2	98.1	100.1	84.7	88.9	96	100.5	96.7	104.3	97.5	103.4	98	102.1	97.3	104.5	97	100.4	100.3	101.8	97.1	103.8	97.1	103	100	102.3	98.3	103	98.6	103.2	103.3	3322.3	94.9229
	3	0	68.2	66.6	62.5	96.8	97	101.2	96.7	101.9	98	96.3	97	102.3	94.8	104.7	97.2	99.3	95.1	91.1	96.8	99.6	97	99.3	99	101.8	96.2	91.2	97.8	101.2	97.7	103.1	97.5	103.2	98.3	100.5	101.1	3348	95.6571
	4	0	69	67.8	68	105.9	97.4	103.3	98.2	101.8	97	102	95.7	99.8	98.4	105	98.4	104.8	96.8	105.6	99.7	102.8	98.7	105.3	97	102.1	98.4	102.5	99.6	102.8	100.2	103.4	99.1	102.9	99.9	104.1	105	3438.4	98.24
	5	0	60.9	65.5	70.7	35.8	92.7	97.3	96.4	91.7	93.4	91.2	94.5	91.7	96.8	94.4	98	96.9	97.2	90.1	98.2	103.2	99.5	104.6	98.3	98	97.9	105.8	98.6	102.3	98.6	103.6	98.7	102.7	100.1	103.8	98.4	3267.5	93.3571
ALD + BLEx	1	0	50.9	82.2	80	91.2	83	89.1	92.9	76.1	69.3	42.9	58.7	57.8	63.1	57.7	75.2	56.1	73.9	60	86.2	66.1	66.7	75.6	77.7	74.7	88.3	77.6	80.6	83.8	68	80	87.6	83.3	78.4	73.3	67.3	2575.3	73.58
	2	0	65.9	82.6	66.7	92.9	70.5	72.7	94.1	65	46.6	38.4	47.1	47.2	52.4	48.3	58.2	58.2	62.2	56.4	76.7	65.4	59.5	73.6	71.7	71.2	80.8	68.3	76.9	80.4	77.9	81.2	83.8	82	80.4	83.6	70.9	2409.7	68.8486
	3	0	60.8	85.1	64.8	95.2	62.6	72	97	64.2	42.1	40	49.6	48.4	58.8	41.5	61.4	45	70.1	46.6	71.2	57.1	75.8	64.7	71.7	68	79.6	60.7	78	68.6	80.5	77.1	74.8	72.4	79.3	78.7	65.6	2329	66.5429
	4	0	69.8	86.9	61.7	98.4	67.3	66.1	92.8	67.1	54.1	40.8	53	50.4	59.5	57.3	65.5	64.1	61.9	58.5	77.2	73.3	71.3	71.5	83.9	74.7	74.4	76.9	78	80.3	61.8	70.7	80.4	71.8	78.1	74.5	67.4	2441.4	69.7543
	5	0	68.5	88.2	46.7	80.9	73.7	77.7	81.2	70.9	47.8	48.7	49.4	54.6	59.2	51.5	63.6	63.2	62.8	59.6	74.6	70.8	69.5	73.2	83.4	77.1	80.3	76.3	79.6	82.9	73.5	75	72.1	73.7	72.9	71.6	66.8	2421.5	69.1857
	average
		1	2	3	4	5	6	7	8	9	10	11	12	13	14	15	16	17	18	19	20	21	22	23	24	25	26	27	28	29	30	31	32	33	34	35	total	averge
	NLD	62.08	59.14	79.84	94.78	86.8	80.14	96.32	89.1	96.9	90.86	97.32	79.9	95.88	101.84	98.72	106.68	98.22	98.76	98.74	102.94	98.92	101.3	99.88	99.6	99.18	102.98	101.98	99.5	98.3	102.4	99.64	98.92	97.06	99.48	104.66	3318.76	94.8217
	ALD	72.4	92.22	76.62	101.2	77.04	82.7	90.26	80.64	54.84	43.6	62.68	53.46	60.62	55.46	69.76	58.9	69.9	62.64	74.66	70.74	76.44	68.8	81.8	63.02	77.84	73.56	81.9	75.34	75.64	79.96	77.24	81.1	80.8	78.38	71.72	2553.88	72.968
	NLD + BLEx	63.06	66.84	63.76	82.12	94.72	98.12	97.68	98.48	93.76	94.62	96.4	98.82	96.6	102.16	97.54	101.56	96.44	98.46	97.82	103.08	98.06	102.64	98.42	100.3	97.1	100.8	97.98	102.34	98.22	101.32	98.24	102.84	99.2	102.26	102.26	3344.02	95.5434
	ALD + BLEx	63.18	85	63.98	91.72	71.42	75.52	91.6	68.66	51.98	42.16	51.56	51.68	58.6	51.26	64.78	57.32	66.18	56.22	77.18	66.54	68.56	71.72	77.68	73.14	80.68	71.96	78.62	79.2	72.34	76.8	79.74	76.64	77.82	76.34	67.6	2435.38	69.5823
	S.D.
		1	2	3	4	5	6	7	8	9	10	11	12	13	14	15	16	17	18	19	20	21	22	23	24	25	26	27	28	29	30	31	32	33	34	35		average
	NLD	8.18059	3.47966	5.05994	11.8439	11.0075	24.5029	2.8735	12.0167	1.8262	7.72548	1.43248	38.9261	5.65305	2.9863	0.66106	27.1834	1.14324	8.2078	1.15239	1.31453	0.988433	5.63072	1.16276	4.9985	0.630079	4.10512	9.02286	7.64035	2.5387	1.34164	0.963328	2.73167	2.92113	7.0347	0.760263		2.48066
	ALD	6.17535	2.99533	3.99149	1.8868	11.4609	15.0922	5.83207	9.22079	10.6176	6.93289	18.0325	7.58802	7.08816	10.1925	9.81596	6.35453	9.04793	6.2732	8.5865	8.24761	8.21906	7.3024	8.53961	24.6591	9.21103	7.05642	8.50059	10.7081	10.77	8.27665	6.17803	8.28161	3.25807	7.997	6.79978		6.60833
	NLD + BLEx	7.14409	1.45017	5.41091	27.4339	2.90637	4.10938	1.09407	4.29558	5.34911	5.04252	1.6109	4.10938	1.28647	4.45455	0.69857	3.32009	1.2973	7.29198	1.17346	2.18792	1.08766	2.64632	1.29885	2.19545	1.07005	5.68023	1.14105	0.69857	2.2698	4.01086	0.691375	0.304959	0.787401	2.01817	2.56768		1.76418
	ALD + BLEx	7.68095	2.62011	11.9217	6.62322	7.66335	8.63493	6.05599	4.90133	10.589	3.99912	4.51254	4.42854	3.86975	6.74596	6.42666	7.65813	5.48972	5.55626	5.56794	6.21394	6.0488	4.18653	5.97762	3.56132	4.97061	7.33539	1.46697	6.12087	7.56261	4.18748	6.35358	5.54824	2.89258	4.83146	1.97864		2.54681
[truncated: 22 more columns]

## Sheet: average
	food intake average
		NLD	NLD + BLEx	ALD	ALD + BLEx
		92.5257	95.54	78.7229	73.58
		96.8886	94.9229	71.6686	68.8486
		97.8343	95.6571	78.5971	66.5429
		94.46	98.24	73.28	69.7543
		92.4	93.3571	62.5714	69.1857
	average	94.8217	95.5434	72.968	69.5823
	s.d.	2.48066	1.76418	6.60833	2.54681

## Sheet: average(ANOVA)
	food intake average
		NLD	ALD
	control	92.5257	78.7229
		96.8886	71.6686
		97.8343	78.5971
		94.46	73.28
		92.4	62.5714
	BLEx	95.54	73.58
		94.9229	68.8486
		95.6571	66.5429
		98.24	69.7543
		93.3571	69.1857
two-way ANOVA
	data number	average	unbiased vatriance	s.d.	s.e.
control,NLD	5	94.8217	6.15366	2.48066	1.10938
control,ALD	5	72.968	43.67	6.60833	2.95534
BLEx,NLD	5	95.5434	3.11235	1.76418	0.788967
BLEx,ALD	5	69.5823	6.48626	2.54681	1.13897
control	10	83.8949	154.806	12.4421	3.93454
BLEx	10	82.5629	191.483	13.8377	4.37588
NLD	10	95.1826	4.26291	2.06468	0.65291
ALD	10	71.2751	25.4759	5.04736	1.59612
total	20	83.2289	164.499	12.8257	2.86791
ANOVA table
Variation factors	Sum of squared deviations	Degree of freedom	mean square	F value	P value	Ｆ(0.95)
Total variation	3125.47	19
Line spacing change	8.87112	1	8.87112	0.597157	0.45093	4.494
Inter-row change	2857.83	1	2857.83	192.374	2.45852e-10	4.494
Interaction	21.0887	1	21.0887	1.41958	0.250847	4.494
Error variation	237.689	16	14.8556
