# Supplementary material for: Chronic intake of high-dose of blueberry leaf extract does not augment the harmful effects of ethanol in rats
Source: PeerJ. 2019 Jun 7;7:e6989. doi: 10.7717/peerj.6989 (PMC6557255; doi:10.7717/peerj.6989)
Supplement: Dataset S3 [file peerj-07-6989-s003.xlsx]

## Sheet: liver weight
	Liver (g)						Liver (g/g body weight)
		NLD	NLD + BLEx	ALD	ALD + BLEx			NLD	NLD + BLEx	ALD	ALD + BLEx
		16.2881	16.8886	16.1448	13.577			0.033825	0.0356119	0.0381593	0.0360898
		16.5852	15.688	15.2882	13.454			0.0352112	0.0331061	0.041526	0.0353198
		14.535	16.7686	14.3847	13.2546			0.030185	0.0351506	0.0351138	0.0365634
		14.3343	15.5391	12.831	13.4385			0.0304946	0.0319347	0.0318925	0.0347796
		16.0203	15.2269	10.3747	11.0774			0.0331258	0.0318069	0.0292187	0.0288294
	average	15.5526	16.0222	13.8047	12.9603		average	0.0325683	0.033522	0.035182	0.0343164
	s.d.	1.04232	0.755867	2.2763	1.05885		s.d.	0.00217114	0.00177865	0.00488609	0.00314336
	s.e.	0.46614	0.338034	1.01799	0.473532		s.e.	0.000970964	0.000795436	0.00218513	0.00140575
	Body weight (g)
		NLD	NLD + BLEx	ALD	ALD + BLEx
		481.54	474.24	423.09	376.2
		471.02	473.87	368.16	380.92
		481.53	477.05	409.66	362.51
		470.06	486.59	402.32	386.39
		483.62	478.73	355.07	384.24

## Sheet: ANOVA
		NLD	ALD
	control	0.033825	0.0381593
		0.0352112	0.041526
		0.030185	0.0351138
		0.0304946	0.0318925
		0.0331258	0.0292187
	BLEx	0.0356119	0.0360898
		0.0331061	0.0353198
		0.0351506	0.0365634
		0.0319347	0.0347796
		0.0318069	0.0288294
two-way ANOVA
	data number	average	unbiased vatriance	s.d.	s.e.
control,NLD	5	0.0325683	4.71385e-06	0.00217114	0.000970964
control,ALD	5	0.035182	2.38739e-05	0.00488609	0.00218513
BLEx,NLD	5	0.033522	3.16359e-06	0.00177865	0.000795436
BLEx,ALD	5	0.0343164	9.88071e-06	0.00314336	0.00140575
control	10	0.0338752	1.46033e-05	0.00382143	0.00120844
BLEx	10	0.0339192	5.97275e-06	0.00244392	0.000772836
NLD	10	0.0330452	3.75374e-06	0.00193746	0.000612678
ALD	10	0.0347492	1.52102e-05	0.00390003	0.0012333
total	20	0.0338972	9.74706e-06	0.00312203	0.000698107
ANOVA table
Variation factors	Sum of squared deviations	Degree of freedom	mean square	F value	P value	Ｆ(0.95)
Total variation	0.000185194	19
Line spacing change	9.69154e-09	1	9.69154e-09	0.000931161	0.976034	4.494
Inter-row change	1.45186e-05	1	1.45186e-05	1.39495	0.254831	4.494
Interaction	4.13753e-06	1	4.13753e-06	0.397533	0.537268	4.494
Error variation	0.000166528	16	1.0408e-05
