# Supplementary material for: Chronic intake of high-dose of blueberry leaf extract does not augment the harmful effects of ethanol in rats
Source: PeerJ. 2019 Jun 7;7:e6989. doi: 10.7717/peerj.6989 (PMC6557255; doi:10.7717/peerj.6989)
Supplement: Dataset S4 [file peerj-07-6989-s004.xlsx]

## Sheet: activity
	GOT abs								GPT abs
		NLD	NLD+BLEx	ALD	ALD+BLEx	standard	blanck			NLD	NLD+BLEx	ALD	ALD+BLEx	standard	blanck
		0.257	0.231	0.336	0.355	0.283	0.011			0.064	0.059	0.073	0.109	0.334	0.011
		0.266	0.205	1.884	0.351					0.067	0.055	1.204	0.123
		0.194	0.258	0.62	0.21					0.055	0.054	0.092	0.087
		0.174	0.165	0.332	0.413					0.046	0.05	0.073	0.133
		0.276	0.313	0.177	0.241					0.063	0.049	0.07	0.06
	average	0.2334	0.2344	0.6698	0.314				average	0.059	0.0534	0.3024	0.1024
	GOT abs (-blanck)								GPT abs (-blanck)
		NLD	NLD+BLEx	ALD	ALD+BLEx	standard				NLD	NLD+BLEx	ALD	ALD+BLEx	standard
		0.246	0.22	0.325	0.344	0.272				0.053	0.048	0.062	0.098	0.323
		0.255	0.194	1.873	0.34					0.056	0.044	1.193	0.112
		0.183	0.247	0.609	0.199					0.044	0.043	0.081	0.076
		0.163	0.154	0.321	0.402					0.035	0.039	0.062	0.122
		0.265	0.302	0.166	0.23					0.052	0.038	0.059	0.049
	average	0.2224	0.2234	0.6588	0.303				average	0.048	0.0424	0.2914	0.0914
	GOT (Karmen)								GPT (Karmen)
		NLD	NLD+BLEx	ALD	ALD+BLEx					NLD	NLD+BLEx	ALD	ALD+BLEx
		90.4412	80.8824	119.485	126.471					16.4087	14.8607	19.195	30.3406
		93.75	71.3235	688.603	125					17.3375	13.6223	369.35	34.6749
		67.2794	90.8088	223.897	73.1618					13.6223	13.3127	25.0774	23.5294
		59.9265	56.6176	118.015	147.794					10.8359	12.0743	19.195	37.7709
		97.4265	111.029	61.0294	84.5588					16.0991	11.7647	18.2663	15.1703
	average	81.7647	82.1324	242.206	111.397				average	14.8607	13.1269	90.2167	28.2972
	GOT (UI/L)		GOT=AST						GPT (UI/L)		GPT=ALT
		NLD	NLD + BLEx	ALD	ALD + BLEx					NLD	NLD + BLEx	ALD	ALD + BLEx
		43.5926	38.9853	57.5919			※A2, 3, AB1は			7.90898	7.16285	9.25201
		45.1875	34.3779		60.25		溶血が見られたため			8.35666	6.56594		16.7133
		32.4287	43.7699		35.264		排除した			6.56594	6.41672		11.3412
		28.8846	27.2897	56.8831	71.2368					5.22291	5.81981	9.25201	18.2056
		46.9596	53.5162	29.4162	40.7574					7.75975	5.67059	8.80433	7.31207
	average	39.4106	39.5878	47.9637	51.877				average	7.16285	6.32718	9.10279	13.393
	s.d.	8.17609	9.87722	16.0666	16.7784				s.d.	1.27061	0.602474	0.258467	5.01242
	s.e.	3.65646	4.41723	9.27603	8.38921				s.e.	0.568236	0.269435	0.149226	2.50621
	AST/ALT
		NLD	NLD + BLEx	ALD	ALD + BLEx
		5.51179	5.44271	6.2248
		5.40737	5.2358		3.60491
		4.93892	6.82122		3.10938
		5.53036	4.6891	6.14819	3.91291
		6.05168	9.4375	3.3411	5.57398
	average	5.48802	6.32527	5.23803	4.05029
	s.d.	0.39626	1.90885	1.64323	1.06836
	s.e.	0.177213	0.853664	0.948721	0.534181

## Sheet: ANOVA
	GOT abs								GPT abs
		NLD	NLD+BLEx	ALD	ALD+BLEx	standard	blanck			NLD	NLD+BLEx	ALD	ALD+BLEx	standard	blanck
		0.257	0.231	0.336	0.355	0.283	0.011			0.064	0.059	0.073	0.109	0.334	0.011
		0.266	0.205	1.884	0.351					0.067	0.055	1.204	0.123
		0.194	0.258	0.62	0.21					0.055	0.054	0.092	0.087
		0.174	0.165	0.332	0.413					0.046	0.05	0.073	0.133
		0.276	0.313	0.177	0.241					0.063	0.049	0.07	0.06
	average	0.2334	0.2344	0.6698	0.314				average	0.059	0.0534	0.3024	0.1024
	GOT abs (-blanck)								GPT abs (-blanck)
		NLD	NLD+BLEx	ALD	ALD+BLEx	standard				NLD	NLD+BLEx	ALD	ALD+BLEx	standard
		0.246	0.22	0.325	0.344	0.272				0.053	0.048	0.062	0.098	0.323
		0.255	0.194	1.873	0.34					0.056	0.044	1.193	0.112
		0.183	0.247	0.609	0.199					0.044	0.043	0.081	0.076
		0.163	0.154	0.321	0.402					0.035	0.039	0.062	0.122
		0.265	0.302	0.166	0.23					0.052	0.038	0.059	0.049
	average	0.2224	0.2234	0.6588	0.303				average	0.048	0.0424	0.2914	0.0914
	GOT (Karmen)								GPT (Karmen)
		NLD	NLD+BLEx	ALD	ALD+BLEx					NLD	NLD+BLEx	ALD	ALD+BLEx
		90.4412	80.8824	119.485	126.471					16.4087	14.8607	19.195	30.3406
		93.75	71.3235	688.603	125					17.3375	13.6223	369.35	34.6749
		67.2794	90.8088	223.897	73.1618					13.6223	13.3127	25.0774	23.5294
		59.9265	56.6176	118.015	147.794					10.8359	12.0743	19.195	37.7709
		97.4265	111.029	61.0294	84.5588					16.0991	11.7647	18.2663	15.1703
	average	81.7647	82.1324	242.206	111.397				average	14.8607	13.1269	90.2167	28.2972
	AST				ALT				AST/ALT
		NLD	ALD			NLD	ALD			NLD	ALD
	control	43.5926	57.5919		control	7.90898	9.25201		control	5.51179	6.2248
		45.1875				8.35666				5.40737
		32.4287				6.56594				4.93892
		28.8846	56.8831			5.22291	9.25201			5.53036	6.14819
		46.9596	29.4162			7.75975	8.80433			6.05168	3.3411
	BLEx	38.9853			BLEx	7.16285			BLEx	5.44271
		34.3779	60.25			6.56594	16.7133			5.2358	3.60491
		43.7699	35.264			6.41672	11.3412			6.82122	3.10938
		27.2897	71.2368			5.81981	18.2056			4.6891	3.91291
		53.5162	40.7574			5.67059	7.31207			9.4375	5.57398
AST
two-way ANOVA
	data number	average	unbiased vatriance	s.d.	s.e.
control,NLD	5	39.4106	66.8484	8.17609	3.65646
control,ALD	3	47.9637	258.134	16.0666	9.27603
BLEx,NLD	5	39.5878	97.5595	9.87722	4.41723
BLEx,ALD	4	51.877	281.516	16.7784	8.38921
control	8	42.618	131.547	11.4694	4.05505
BLEx	9	45.0497	196.3	14.0107	4.67023
NLD	10	39.4992	73.0789	8.54862	2.70331
ALD	7	50.1999	231.178	15.2045	5.74678
total	17	43.9054	157.267	12.5406	3.04154
ANOVA table
Variation factors	Sum of squared deviations	Degree of freedom	mean square	F value	P value	Ｆ(0.95)
Total variation	2516.27	16
Line spacing change	25.0431	1	25.0431	0.161293	0.694493	4.66719
Inter-row change	458.584	1	458.584	2.95356	0.109395	4.66719
Interaction	14.195	1	14.195	0.091424	0.767158	4.66719
Error variation	2018.45	13	155.265
ALT
two-way ANOVA
	data number	average	unbiased vatriance	s.d.	s.e.
control,NLD	5	7.16285	1.61446	1.27061	0.568236
control,ALD	3	9.10279	0.0668052	0.258467	0.149226
BLEx,NLD	5	6.32718	0.362975	0.602474	0.269435
BLEx,ALD	4	13.393	25.1243	5.01242	2.50621
control	8	7.89033	1.94968	1.39631	0.49367
BLEx	9	9.46756	23.4715	4.84474	1.61491
NLD	10	6.74502	1.07284	1.03578	0.327543
ALD	7	11.5544	17.8434	4.22414	1.59657
total	17	8.72533	13.2472	3.63968	0.882751
ANOVA table
Variation factors	Sum of squared deviations	Degree of freedom	mean square	F value	P value	Ｆ(0.95)
Total variation	211.956	16
Line spacing change	10.536	1	10.536	1.64199	0.222439	4.66719
Inter-row change	91.2832	1	91.2832	14.226	0.00232914	4.66719
Interaction	26.7203	1	26.7203	4.16422	0.0621356	4.66719
Error variation	83.4163	13	6.41664
AST/ALT
two-way ANOVA
	data number	average	unbiased vatriance	s.d.	s.e.
control,NLD	5	5.48802	0.157022	0.39626	0.177213
control,ALD	3	5.23803	2.70022	1.64323	0.948721
BLEx,NLD	5	6.32527	3.64371	1.90885	0.853664
BLEx,ALD	4	4.05029	1.1414	1.06836	0.534181
control	8	5.39428	0.877958	0.936994	0.331277
BLEx	9	5.31417	3.68752	1.92029	0.640097
NLD	10	5.90664	1.88393	1.37256	0.434043
ALD	7	4.55932	1.87383	1.36888	0.517388
total	17	5.35187	2.22956	1.49317	0.362148
ANOVA table
Variation factors	Sum of squared deviations	Degree of freedom	mean square	F value	P value	Ｆ(0.95)
Total variation	35.673	16
Line spacing change	0.0271795	1	0.0271795	0.0147054	0.905335	4.66719
Inter-row change	7.44826	1	7.44826	4.02984	0.0659545	4.66719
Interaction	4.17003	1	4.17003	2.25618	0.156978	4.66719
Error variation	24.0276	13	1.84827
