# Supplementary material for: Chronic intake of high-dose of blueberry leaf extract does not augment the harmful effects of ethanol in rats
Source: PeerJ. 2019 Jun 7;7:e6989. doi: 10.7717/peerj.6989 (PMC6557255; doi:10.7717/peerj.6989)
Supplement: Dataset S5 [file peerj-07-6989-s005.xlsx]

## Sheet: albumin
	albumin
	g/dL	-blank			a=	0.124229
	0	0	0.177		b=	-0.000571429
	1	0.123	0.3
	2	0.25	0.427
	3	0.37	0.547
	4	0.494	0.671
	5	0.623	0.8
	abs
		NLD	NLD+BLEx	ALD	ALD+BLEx
		0.625	0.665	0.727	0.661
		0.663	0.693	0.638	0.663
		0.67	0.666	0.688	0.664
		0.677	0.707	0.673	0.699
		0.704	0.69	0.682	0.658
	average	0.6678	0.6842	0.6816	0.669
	-blank						albumin (g/dL)
		NLD	NLD+BLEx	ALD	ALD+BLEx			NLD	NLD + BLEx	ALD	ALD + BLEx
		0.448	0.488	0.55	0.484			3.61086	3.93284	4.43192	3.90064
		0.486	0.516	0.461	0.486			3.91674	4.15823	3.7155	3.91674
		0.493	0.489	0.511	0.487			3.97309	3.94089	4.11799	3.92479
		0.5	0.53	0.496	0.522			4.02944	4.27093	3.99724	4.20653
		0.527	0.513	0.505	0.481			4.24678	4.13408	4.06969	3.87649
	average	0.4908	0.5072	0.5046	0.492		average	3.95538	4.0874	4.06647	3.96504
							s.d.	0.229621	0.146827	0.256998	0.136251
							s.e.	0.102689	0.0656629	0.114933	0.0609335

## Sheet: total protein
	total protein
	g/dL	-blank			a=	0.0469666
	0	0	0.075		b=	7.73584e-05
	1.64	0.076	0.151
	3.28	0.155	0.23
	4.92	0.23	0.305
	6.56	0.305	0.38
	8.2	0.393	0.468
	12.1806	0.569	0.644
	abs
		NLD	NLD+BLEx	ALD	ALD+BLEx
		0.352	0.403	0.398	0.364
		0.391	0.377	0.355	0.36
		0.366	0.362	0.391	0.363
		0.38	0.368	0.363	0.369
		0.38	0.379	0.367	0.352
	average	0.3738	0.3778	0.3748	0.3616
	-blank						total protein(g/dL)
		NLD	NLD+BLEx	ALD	ALD+BLEx			NLD	NLD + BLEx	ALD	ALD + BLEx
		0.277	0.328	0.323	0.289			5.89616	6.98204	6.87558	6.15166
		0.316	0.302	0.28	0.285			6.72654	6.42846	5.96004	6.0665
		0.291	0.287	0.316	0.288			6.19425	6.10908	6.72654	6.13037
		0.305	0.293	0.288	0.294			6.49233	6.23683	6.13037	6.25812
		0.305	0.304	0.292	0.277			6.49233	6.47104	6.21554	5.89616
	average	0.2988	0.3028	0.2998	0.2866		average	6.36032	6.44549	6.38161	6.10056
							s.d.	0.320934	0.333744	0.397306	0.133477
							s.e.	0.143526	0.149255	0.177681	0.0596928

## Sheet: AG ratio
	albumin (g/dL)						total protein (g/dL)
		NLD	NLD+BLEx	ALD	ALD+BLEx			NLD	NLD+BLEx	ALD	ALD+BLEx
		3.61086	3.93284	4.43192	3.90064			5.89616	6.98204	6.87558	6.15166
		3.91674	4.15823	3.7155	3.91674			6.72654	6.42846	5.96004	6.0665
		3.97309	3.94089	4.11799	3.92479			6.19425	6.10908	6.72654	6.13037
		4.02944	4.27093	3.99724	4.20653			6.49233	6.23683	6.13037	6.25812
		4.24678	4.13408	4.06969	3.87649			6.49233	6.47104	6.21554	5.89616
	average	3.95538	4.0874	4.06647	3.96504		average	6.36032	6.44549	6.38161	6.10056
	s.d.	0.229621	0.146827	0.256998	0.136251		s.d.	0.320934	0.333744	0.397306	0.133477
	s.e.	0.102689	0.0656629	0.114933	0.0609335		s.e.	0.143526	0.149255	0.177681	0.0596928
	A/G
		NLD	NLD + BLEx	ALD	ALD + BLEx
		1.58003	1.2898	1.81364	1.73283
		1.39396	1.83164	1.65535	1.82195
		1.78875	1.8176	1.57865	1.77948
		1.63606	2.1725	1.87388	2.05038
		1.8912	1.76901	1.89654	1.91937
	average	1.658	1.77611	1.76361	1.8608
	s.d.	0.192194	0.315629	0.139879	0.126359
	s.e.	0.0859518	0.141153	0.0625556	0.0565095

## Sheet: ANOVA
	albumin (g/dL)				total protein (g/dL)				A/G
		NLD	ALD			NLD	ALD			NLD	ALD
	control	3.61086	4.43192		control	5.89616	6.87558		control	1.58003	1.81364
		3.91674	3.7155			6.72654	5.96004			1.39396	1.65535
		3.97309	4.11799			6.19425	6.72654			1.78875	1.57865
		4.02944	3.99724			6.49233	6.13037			1.63606	1.87388
		4.24678	4.06969			6.49233	6.21554			1.8912	1.89654
	BLEx	3.93284	3.90064		BLEx	6.98204	6.15166		BLEx	1.2898	1.73283
		4.15823	3.91674			6.42846	6.0665			1.83164	1.82195
		3.94089	3.92479			6.10908	6.13037			1.8176	1.77948
		4.27093	4.20653			6.23683	6.25812			2.1725	2.05038
		4.13408	3.87649			6.47104	5.89616			1.76901	1.91937
albumin (g/dL)
two-way ANOVA
	data number	average	unbiased vatriance	s.d.	s.e.
control,NLD	5	3.95538	0.0527256	0.229621	0.102689
control,ALD	5	4.06647	0.0660479	0.256998	0.114933
BLEx,NLD	5	4.0874	0.0215581	0.146827	0.0656629
BLEx,ALD	5	3.96504	0.0185644	0.136251	0.0609335
control	10	4.01092	0.056216	0.237099	0.0749773
BLEx	10	4.02622	0.0219908	0.148293	0.0468943
NLD	10	4.02139	0.037856	0.194566	0.0615273
ALD	10	4.01575	0.040463	0.201154	0.0636106
total	20	4.01857	0.0371069	0.192631	0.0430737
ANOVA table
Variation factors	Sum of squared deviations	Degree of freedom	mean square	F value	P value	Ｆ(0.95)
Total variation	0.70503	19
Line spacing change	0.00116959	1	0.00116959	0.0294429	0.865912	4.494
Inter-row change	0.000158753	1	0.000158753	0.00399641	0.950377	4.494
Interaction	0.0681182	1	0.0681182	1.71479	0.208859	4.494
Error variation	0.635584	16	0.039724
total protein (g/dL)
two-way ANOVA
	data number	average	unbiased vatriance	s.d.	s.e.
control,NLD	5	6.36032	0.102998	0.320934	0.143526
control,ALD	5	6.38161	0.157852	0.397306	0.177681
BLEx,NLD	5	6.44549	0.111385	0.333744	0.149255
BLEx,ALD	5	6.10056	0.0178162	0.133477	0.0596928
control	10	6.37097	0.11606	0.340675	0.107731
BLEx	10	6.27303	0.0904711	0.300784	0.0951163
NLD	10	6.40291	0.0972964	0.311924	0.0986389
ALD	10	6.24109	0.100016	0.316254	0.100008
total	20	6.322	0.100355	0.316788	0.070836
ANOVA table
Variation factors	Sum of squared deviations	Degree of freedom	mean square	F value	P value	Ｆ(0.95)
Total variation	1.90674	19
Line spacing change	0.0479631	1	0.0479631	0.491864	0.493172	4.494
Inter-row change	0.130924	1	0.130924	1.34263	0.263573	4.494
Interaction	0.167644	1	0.167644	1.7192	0.208302	4.494
Error variation	1.56021	16	0.097513
A/G
two-way ANOVA
	data number	average	unbiased vatriance	s.d.	s.e.
control,NLD	5	1.658	0.0369386	0.192194	0.0859518
control,ALD	5	1.76361	0.019566	0.139879	0.0625556
BLEx,NLD	5	1.77611	0.0996214	0.315629	0.141153
BLEx,ALD	5	1.8608	0.0159666	0.126359	0.0565095
control	10	1.71081	0.0282115	0.167963	0.0531145
BLEx	10	1.81846	0.053365	0.231009	0.0730514
NLD	10	1.71705	0.0645683	0.254103	0.0803544
ALD	10	1.81221	0.0184162	0.135706	0.0429141
total	20	1.76463	0.0416912	0.204184	0.045657
ANOVA table
Variation factors	Sum of squared deviations	Degree of freedom	mean square	F value	P value	Ｆ(0.95)
Total variation	0.792132	19
Line spacing change	0.057943	1	0.057943	1.34678	0.262865	4.494
Inter-row change	0.0452713	1	0.0452713	1.05225	0.320248	4.494
Interaction	0.000546972	1	0.000546972	0.0127134	0.911628	4.494
Error variation	0.688371	16	0.0430232
