# Supplementary material for: Chronic intake of high-dose of blueberry leaf extract does not augment the harmful effects of ethanol in rats
Source: PeerJ. 2019 Jun 7;7:e6989. doi: 10.7717/peerj.6989 (PMC6557255; doi:10.7717/peerj.6989)
Supplement: Dataset S6 [file peerj-07-6989-s006.xlsx]

## Sheet: 20180829-ADHM
Results of Photometric1
	Plate:2 - Wavelength:340
	Iteration: 1
	0.45	0.446	0.449	0.457	0.451	0.449	0.506	0.502	0.469	0.473	0.283	0.29
	0.451	0.452	0.449	0.43	0.445	0.436	0.478	0.476	0.458	0.468	0.293	0.296
	0.476	0.482	0.476	0.474	0.498	0.51	0.484	0.492	0.492	0.486
	0.467	0.468	0.468	0.467	0.484	0.508	0.493	0.487	0.482	0.476
	0.544	0.539	0.7	0.715	0.563	0.56	0.519	0.543	0.549	0.54
	0.541	0.522	0.689	0.704	0.537	0.566	0.515	0.523	0.536	0.529
	0.51	0.515	0.548	0.555	0.545	0.56	0.575	0.573	0.524	0.528
	0.513	0.511	0.537	0.531	0.535	0.534	0.557	0.563	0.507	0.506
	Iteration: 2
	0.471	0.463	0.473	0.482	0.467	0.466	0.543	0.54	0.494	0.499	0.278	0.285
	0.454	0.455	0.449	0.433	0.446	0.438	0.478	0.478	0.46	0.469	0.289	0.291
	0.505	0.507	0.495	0.496	0.519	0.529	0.504	0.512	0.506	0.504
	0.471	0.469	0.469	0.473	0.485	0.51	0.495	0.49	0.484	0.48
	0.573	0.568	0.719	0.737	0.584	0.584	0.54	0.566	0.579	0.572
	0.543	0.522	0.683	0.698	0.537	0.56	0.516	0.523	0.539	0.533
	0.538	0.541	0.581	0.583	0.569	0.582	0.599	0.593	0.546	0.553
	0.516	0.516	0.542	0.535	0.537	0.537	0.562	0.565	0.514	0.51
	Iteration: 3
	0.498	0.487	0.506	0.515	0.487	0.487	0.589	0.587	0.523	0.529	0.275	0.282
	0.457	0.457	0.451	0.435	0.449	0.44	0.487	0.48	0.463	0.472	0.285	0.287
	0.54	0.536	0.519	0.522	0.542	0.552	0.53	0.539	0.528	0.529
	0.473	0.472	0.47	0.474	0.487	0.512	0.497	0.494	0.487	0.483
	0.613	0.603	0.745	0.761	0.606	0.613	0.567	0.594	0.615	0.613
	0.548	0.522	0.682	0.698	0.535	0.559	0.516	0.525	0.541	0.537
	0.575	0.575	0.616	0.618	0.594	0.607	0.623	0.622	0.576	0.588
	0.52	0.521	0.548	0.541	0.542	0.541	0.566	0.567	0.52	0.515
	Iteration: 4
	0.53	0.517	0.546	0.555	0.513	0.512	0.641	0.639	0.561	0.568	0.273	0.28
	0.461	0.461	0.456	0.439	0.452	0.444	0.491	0.485	0.467	0.476	0.283	0.285
	0.583	0.574	0.549	0.553	0.571	0.581	0.561	0.569	0.56	0.561
	0.479	0.476	0.473	0.476	0.492	0.516	0.502	0.498	0.491	0.488
	0.657	0.642	0.773	0.793	0.637	0.648	0.599	0.628	0.659	0.662
	0.551	0.526	0.683	0.699	0.536	0.56	0.517	0.528	0.544	0.542
	0.618	0.616	0.658	0.658	0.629	0.645	0.656	0.655	0.614	0.629
	0.522	0.524	0.553	0.545	0.55	0.545	0.57	0.571	0.524	0.522
	Iteration: 5
	0.563	0.548	0.588	0.596	0.541	0.541	0.697	0.696	0.601	0.609	0.272	0.279
	0.465	0.465	0.46	0.443	0.457	0.449	0.494	0.489	0.471	0.481	0.282	0.284
	0.628	0.617	0.584	0.589	0.604	0.613	0.594	0.604	0.588	0.595
	0.483	0.48	0.476	0.48	0.496	0.522	0.507	0.503	0.495	0.492
	0.707	0.687	0.806	0.828	0.675	0.69	0.636	0.665	0.708	0.717
	0.556	0.53	0.686	0.702	0.54	0.563	0.521	0.531	0.549	0.547
	0.664	0.662	0.705	0.704	0.668	0.682	0.694	0.691	0.654	0.675
	0.526	0.528	0.557	0.549	0.557	0.551	0.574	0.575	0.528	0.526
	Iteration: 6
	0.599	0.581	0.632	0.642	0.573	0.571	0.757	0.754	0.645	0.654	0.271	0.279
	0.469	0.469	0.464	0.448	0.461	0.453	0.497	0.493	0.476	0.486	0.281	0.283
	0.677	0.663	0.622	0.628	0.64	0.649	0.63	0.641	0.621	0.629
	0.49	0.482	0.48	0.485	0.502	0.528	0.512	0.508	0.5	0.496
	0.759	0.733	0.843	0.867	0.717	0.733	0.677	0.707	0.762	0.773
	0.562	0.536	0.689	0.705	0.543	0.567	0.525	0.535	0.553	0.552
	0.713	0.71	0.755	0.753	0.71	0.72	0.735	0.732	0.697	0.723
	0.529	0.532	0.561	0.553	0.562	0.556	0.579	0.579	0.533	0.532

## Sheet: 180830
Immno Version 1.50
測定モード：単波長測定選択されているフィルタ：590
グループ設定情報 [1/1]
[A]= : : : : : : : : : : :
[B]=@:@:1:1:1:1:1:1: : : :
[C]=1:1:1:1:1:1:1:1: : : :
[D]=1:1:1:1:1:1:1:1: : : :
[E]=1:1:1:1:1:1:1:1: : : :
[F]=1:1:1:1:1:1:1:1: : : :
[G]=1:1:1:1:1:1:1:1: : : :
[H]=1:1:1:1:1:1:1:1: : : :
測定データ [1/1]
-0.033	-0.024	-0.028	-0.028	-0.025	-0.026	-0.029	-0.026	-0.029	-0.03	-0.03	-0.027
0	0	0.093	0.091	0.097	0.093	0.101	0.099	-0.037	-0.036	-0.039	-0.039
0.026	0.027	0.088	0.09	0.092	0.089	0.113	0.116	-0.035	-0.036	-0.035	-0.038
0.043	0.046	0.098	0.1	0.096	0.09	0.09	0.088	-0.036	-0.037	-0.037	-0.039
0.073	0.077	0.102	0.104	0.1	0.092	0.093	0.101	-0.035	-0.038	-0.036	-0.037
0.145	0.161	0.11	0.095	0.098	0.094	0.09	0.103	-0.034	-0.036	-0.036	-0.037
0.335	0.346	0.09	0.096	0.099	0.1	0.002	0.004	-0.037	-0.037	-0.038	-0.041
0.086	0.088	0.088	0.09	0.119	0.109	0.003	0.001	-0.04	-0.041	-0.041	-0.041

## Sheet: abs(NLD)
	NLD1						NLD2
		reaction mix		negative mix				reaction mix		negative mix
	0	0.45	0.446	0.451	0.452		0	0.449	0.457	0.449	0.43
	3	0.471	0.463	0.454	0.455		3	0.473	0.482	0.449	0.433
	6	0.498	0.487	0.457	0.457		6	0.506	0.515	0.451	0.435
	9	0.53	0.517	0.461	0.461		9	0.546	0.555	0.456	0.439
	12	0.563	0.548	0.465	0.465		12	0.588	0.596	0.46	0.443
	15	0.599	0.581	0.469	0.469		15	0.632	0.642	0.464	0.448
	NLD3						NLD4
		reaction mix		negative mix				reaction mix		negative mix
	0	0.451	0.449	0.445	0.436		0	0.506	0.502	0.478	0.476
	3	0.467	0.466	0.446	0.438		3	0.543	0.54	0.478	0.478
	6	0.487	0.487	0.449	0.44		6	0.589	0.587	0.487	0.48
	9	0.513	0.512	0.452	0.444		9	0.641	0.639	0.491	0.485
	12	0.541	0.541	0.457	0.449		12	0.697	0.696	0.494	0.489
	15	0.573	0.571	0.461	0.453		15	0.757	0.754	0.497	0.493
	NLD5
		reaction mix		negative mix
	0	0.469	0.473	0.458	0.468
	3	0.494	0.499	0.46	0.469
	6	0.523	0.529	0.463	0.472
	9	0.561	0.568	0.467	0.476
	12	0.601	0.609	0.471	0.481
	15	0.645	0.654	0.476	0.486
	ABS/min
	NLD1						NLD2
		reaction mix	negative mix	reac-nega	R^2			reaction mix	negative mix	reac-nega	R^2
	0	0.448	0.4515	-0.0035	0.990392		0	0.453	0.4395	0.0135	0.992088
	3	0.467	0.4545	0.0125			3	0.4775	0.441	0.0365
	6	0.4925	0.457	0.0355			6	0.5105	0.443	0.0675
	9	0.5235	0.461	0.0625			9	0.5505	0.4475	0.103
	12	0.5555	0.465	0.0905			12	0.592	0.4515	0.1405
	15	0.59	0.469	0.121			15	0.637	0.456	0.181
	NLD3						NLD4
		reaction mix	negative mix	reac-nega	R^2			reaction mix	negative mix	reac-nega	R^2
	0	0.45	0.4405	0.0095	0.989817		0	0.504	0.477	0.027	0.9942
	3	0.4665	0.442	0.0245			3	0.5415	0.478	0.0635
	6	0.487	0.4445	0.0425			6	0.588	0.4835	0.1045
	9	0.5125	0.448	0.0645			9	0.64	0.488	0.152
	12	0.541	0.453	0.088			12	0.6965	0.494	0.2025
	15	0.572	0.457	0.115			15	0.7555	0.497	0.2585
	NLD5
		reaction mix	negative mix	reac-nega	R^2
	0	0.471	0.463	0.008	0.991162
	3	0.4965	0.4645	0.032
	6	0.526	0.4675	0.0585
	9	0.5645	0.4715	0.093
	12	0.605	0.476	0.129
	15	0.6495	0.481	0.1685

## Sheet: abs(NLD+BLEx)
	NLD+BLEx1						NLD+BLEx2
		reaction mix		negative mix				reaction mix		negative mix
	0	0.476	0.482	0.467	0.468		0	0.476	0.474	0.468	0.467
	3	0.505	0.507	0.471	0.469		3	0.495	0.496	0.469	0.473
	6	0.54	0.536	0.473	0.472		6	0.519	0.522	0.47	0.474
	9	0.583	0.574	0.479	0.476		9	0.549	0.553	0.473	0.476
	12	0.628	0.617	0.483	0.48		12	0.584	0.589	0.476	0.48
	15	0.677	0.663	0.49	0.482		15	0.622	0.628	0.48	0.485
	NLD+BLEx3						NLD+BLEx4
		reaction mix		negative mix				reaction mix		negative mix
	0	0.498	0.51	0.484	0.508		0	0.484	0.492	0.493	0.487
	3	0.519	0.529	0.485	0.51		3	0.504	0.512	0.495	0.49
	6	0.542	0.552	0.487	0.512		6	0.53	0.539	0.497	0.494
	9	0.571	0.581	0.492	0.516		9	0.561	0.569	0.502	0.498
	12	0.604	0.613	0.496	0.522		12	0.594	0.604	0.507	0.503
	15	0.64	0.649	0.502	0.528		15	0.63	0.641	0.512	0.508
	NLD+BLEx5
		reaction mix		negative mix
	0	0.492	0.486	0.482	0.476
	3	0.506	0.504	0.484	0.48
	6	0.528	0.529	0.487	0.483
	9	0.56	0.561	0.491	0.488
	12	0.588	0.595	0.495	0.492
	15	0.621	0.629	0.5	0.496
	ABS/min
	NLD+BLEx1						NLD+BLEx2
		reaction mix	negative mix	reac-nega	R^2			reaction mix	negative mix	reac-nega	R^2
	0	0.479	0.4675	0.0115	0.989792		0	0.475	0.4675	0.0075	0.987377
	3	0.506	0.47	0.036			3	0.4955	0.471	0.0245
	6	0.538	0.4725	0.0655			6	0.5205	0.472	0.0485
	9	0.5785	0.4775	0.101			9	0.551	0.4745	0.0765
	12	0.6225	0.4815	0.141			12	0.5865	0.478	0.1085
	15	0.67	0.486	0.184			15	0.625	0.4825	0.1425
	NLD+BLEx3						NLD+BLEx4
		reaction mix	negative mix	reac-nega	R^2			reaction mix	negative mix	reac-nega	R^2
	0	0.504	0.496	0.008	0.992031		0	0.488	0.49	-0.002	0.991191
	3	0.524	0.4975	0.0265			3	0.508	0.4925	0.0155
	6	0.547	0.4995	0.0475			6	0.5345	0.4955	0.039
	9	0.576	0.504	0.072			9	0.565	0.5	0.065
	12	0.6085	0.509	0.0995			12	0.599	0.505	0.094
	15	0.6445	0.515	0.1295			15	0.6355	0.51	0.1255
	NLD+BLEx5
		reaction mix	negative mix	reac-nega	R^2
	0	0.489	0.479	0.01	0.985336
	3	0.505	0.482	0.023
	6	0.5285	0.485	0.0435
	9	0.5605	0.4895	0.071
	12	0.5915	0.4935	0.098
	15	0.625	0.498	0.127

## Sheet: abs(ALD)
	ALD1						ALD2
		reaction mix		negative mix				reaction mix		negative mix
	0	0.544	0.539	0.541	0.522		0	0.7	0.715	0.689	0.704
	3	0.573	0.568	0.543	0.522		3	0.719	0.737	0.683	0.698
	6	0.613	0.603	0.548	0.522		6	0.745	0.761	0.682	0.698
	9	0.657	0.642	0.551	0.526		9	0.773	0.793	0.683	0.699
	12	0.707	0.687	0.556	0.53		12	0.806	0.828	0.686	0.702
	15	0.759	0.733	0.562	0.536		15	0.843	0.867	0.689	0.705
	ALD3						ALD4
		reaction mix		negative mix				reaction mix		negative mix
	0	0.563	0.56	0.537	0.566		0	0.519	0.543	0.515	0.523
	3	0.584	0.584	0.537	0.56		3	0.54	0.566	0.516	0.523
	6	0.606	0.613	0.535	0.559		6	0.567	0.594	0.516	0.525
	9	0.637	0.648	0.536	0.56		9	0.599	0.628	0.517	0.528
	12	0.675	0.69	0.54	0.563		12	0.636	0.665	0.521	0.531
	15	0.717	0.733	0.543	0.567		15	0.677	0.707	0.525	0.535
	ALD5
		reaction mix		negative mix
	0	0.549	0.54	0.536	0.529
	3	0.579	0.572	0.539	0.533
	6	0.615	0.613	0.541	0.537
	9	0.659	0.662	0.544	0.542
	12	0.708	0.717	0.549	0.547
	15	0.762	0.773	0.553	0.552
	ABS/min
	ALD1						ALD2
		reaction mix	negative mix	reac-nega	R^2			reaction mix	negative mix	reac-nega	R^2
	0	0.5415	0.5315	0.01	0.994349		0	0.7075	0.6965	0.011	0.996487
	3	0.5705	0.5325	0.038			3	0.728	0.6905	0.0375
	6	0.608	0.535	0.073			6	0.753	0.69	0.063
	9	0.6495	0.5385	0.111			9	0.783	0.691	0.092
	12	0.697	0.543	0.154			12	0.817	0.694	0.123
	15	0.746	0.549	0.197			15	0.855	0.697	0.158
	ALD3						ALD4
		reaction mix	negative mix	reac-nega	R^2			reaction mix	negative mix	reac-nega	R^2
	0	0.5615	0.5515	0.01	0.992576		0	0.531	0.519	0.012	0.99127
	3	0.584	0.5485	0.0355			3	0.553	0.5195	0.0335
	6	0.6095	0.547	0.0625			6	0.5805	0.5205	0.06
	9	0.6425	0.548	0.0945			9	0.6135	0.5225	0.091
	12	0.6825	0.5515	0.131			12	0.6505	0.526	0.1245
	15	0.725	0.555	0.17			15	0.692	0.53	0.162
	ALD5
		reaction mix	negative mix	reac-nega	R^2
	0	0.5445	0.5325	0.012	0.989415
	3	0.5755	0.536	0.0395
	6	0.614	0.539	0.075
	9	0.6605	0.543	0.1175
	12	0.7125	0.548	0.1645
	15	0.7675	0.5525	0.215

## Sheet: abs(ALD+BLEx)
	ALD+BLEx1						ALD+BLEx2
		reaction mix		negative mix				reaction mix		negative mix
	0	0.51	0.515	0.513	0.511		0	0.548	0.555	0.537	0.531
	3	0.538	0.541	0.516	0.516		3	0.581	0.583	0.542	0.535
	6	0.575	0.575	0.52	0.521		6	0.616	0.618	0.548	0.541
	9	0.618	0.616	0.522	0.524		9	0.658	0.658	0.553	0.545
	12	0.664	0.662	0.526	0.528		12	0.705	0.704	0.557	0.549
	15	0.713	0.71	0.529	0.532		15	0.755	0.753	0.561	0.553
	ALD+BLEx3						ALD+BLEx4
		reaction mix		negative mix				reaction mix		negative mix
	0	0.545	0.56	0.535	0.534		0	0.575	0.573	0.557	0.563
	3	0.569	0.582	0.537	0.537		3	0.599	0.593	0.562	0.565
	6	0.594	0.607	0.542	0.541		6	0.623	0.622	0.566	0.567
	9	0.629	0.645	0.55	0.545		9	0.656	0.655	0.57	0.571
	12	0.668	0.682	0.557	0.551		12	0.694	0.691	0.574	0.575
	15	0.71	0.72	0.562	0.556		15	0.735	0.732	0.579	0.579
	ALD+BLEx5
		reaction mix		negative mix
	0	0.524	0.528	0.507	0.506
	3	0.546	0.553	0.514	0.51
	6	0.576	0.588	0.52	0.515
	9	0.614	0.629	0.524	0.522
	12	0.654	0.675	0.528	0.526
	15	0.697	0.723	0.533	0.532
	ABS/min
	ALD+BLEx1						ALD+BLEx2
		reaction mix	negative mix	reac-nega	R^2			reaction mix	negative mix	reac-nega	R^2
	0	0.5125	0.512	0.0005	0.987615		0	0.5515	0.534	0.0175	0.987963
	3	0.5395	0.516	0.0235			3	0.582	0.5385	0.0435
	6	0.575	0.5205	0.0545			6	0.617	0.5445	0.0725
	9	0.617	0.523	0.094			9	0.658	0.549	0.109
	12	0.663	0.527	0.136			12	0.7045	0.553	0.1515
	15	0.7115	0.5305	0.181			15	0.754	0.557	0.197
	ALD+BLEx3						ALD+BLEx4
		reaction mix	negative mix	reac-nega	R^2			reaction mix	negative mix	reac-nega	R^2
	0	0.5525	0.5345	0.018	0.987621		0	0.574	0.56	0.014	0.986145
	3	0.5755	0.537	0.0385			3	0.596	0.5635	0.0325
	6	0.6005	0.5415	0.059			6	0.6225	0.5665	0.056
	9	0.637	0.5475	0.0895			9	0.6555	0.5705	0.085
	12	0.675	0.554	0.121			12	0.6925	0.5745	0.118
	15	0.715	0.559	0.156			15	0.7335	0.579	0.1545
	ALD+BLEx5
		reaction mix	negative mix	reac-nega	R^2
	0	0.526	0.5065	0.0195	0.983162
	3	0.5495	0.512	0.0375
	6	0.582	0.5175	0.0645
	9	0.6215	0.523	0.0985
	12	0.6645	0.527	0.1375
	15	0.71	0.5325	0.1775

## Sheet: protein conc.
	standard
	ug/ml					a=	0.000167377
	0	0	0	0		b=	-0.00151429
	125	0.0265	0.026	0.027
	250	0.0445	0.043	0.046
	500	0.075	0.073	0.077
	1000	0.153	0.145	0.161
	2000	0.3405	0.335	0.346
	吸光度
							ug/ml	mg/ml
	NLD1	0.087	0.086	0.088		NLD1	26441.6	26.4416
	NLD2	0.092	0.093	0.091		NLD2	27935.2	27.9352
	NLD3	0.089	0.088	0.09		NLD3	27039.1	27.0391
	NLD4	0.099	0.098	0.1		NLD4	30026.3	30.0263
	NLD5	0.103	0.102	0.104		NLD5	31221.2	31.2212
	NLD+BLEx1	0.1025	0.11	0.095		NLD+BLEx1	31071.9	31.0719
	NLD+BLEx2	0.093	0.09	0.096		NLD+BLEx2	28234	28.234
	NLD+BLEx3	0.089	0.088	0.09		NLD+BLEx3	27039.1	27.0391
	NLD+BLEx4	0.095	0.097	0.093		NLD+BLEx4	28831.4	28.8314
	NLD+BLEx5	0.0905	0.092	0.089		NLD+BLEx5	27487.1	27.4871
	ALD1	0.093	0.096	0.09		ALD1	28234	28.234
	ALD2	0.096	0.1	0.092		ALD2	29130.1	29.1301
	ALD3	0.096	0.098	0.094		ALD3	29130.1	29.1301
	ALD4	0.0995	0.099	0.1		ALD4	30175.7	30.1757
	ALD5	0.114	0.119	0.109		ALD5	34507.2	34.5072
	ALD+BLEx1	0.1	0.101	0.099		ALD+BLEx1	30325	30.325
	ALD+BLEx2	0.1145	0.113	0.116		ALD+BLEx2	34656.6	34.6566
	ALD+BLEx3	0.089	0.09	0.088		ALD+BLEx3	27039.1	27.0391
	ALD+BLEx4	0.097	0.093	0.101		ALD+BLEx4	29428.9	29.4289
	ALD+BLEx5	0.0965	0.09	0.103		ALD+BLEx5	29279.5	29.2795

## Sheet:  ADH activity
		NLD					NLD+BLEx					ALD					ALD+BLEx
	min	1	2	3	4	5	1	2	3	4	5	1	2	3	4	5	1	2	3	4	5
	0	-0.0035	0.0135	0.0095	0.027	0.008	0.0115	0.0075	0.008	-0.002	0.01	0.01	0.011	0.01	0.012	0.012	0.0005	0.0175	0.018	0.014	0.0195
	3	0.0125	0.0365	0.0245	0.0635	0.032	0.036	0.0245	0.0265	0.0155	0.023	0.038	0.0375	0.0355	0.0335	0.0395	0.0235	0.0435	0.0385	0.0325	0.0375
	6	0.0355	0.0675	0.0425	0.1045	0.0585	0.0655	0.0485	0.0475	0.039	0.0435	0.073	0.063	0.0625	0.06	0.075	0.0545	0.0725	0.059	0.056	0.0645
	9	0.0625	0.103	0.0645	0.152	0.093	0.101	0.0765	0.072	0.065	0.071	0.111	0.092	0.0945	0.091	0.1175	0.094	0.109	0.0895	0.085	0.0985
	12	0.0905	0.1405	0.088	0.2025	0.129	0.141	0.1085	0.0995	0.094	0.098	0.154	0.123	0.131	0.1245	0.1645	0.136	0.1515	0.121	0.118	0.1375
	15	0.121	0.181	0.115	0.2585	0.1685	0.184	0.1425	0.1295	0.1255	0.127	0.197	0.158	0.17	0.162	0.215	0.181	0.197	0.156	0.1545	0.1775
	protein conc. (mg/ml)	26.4416	27.9352	27.0391	30.0263	31.2212	31.0719	28.234	27.0391	28.8314	27.4871	28.234	29.1301	29.1301	30.1757	34.5072	30.325	34.6566	27.0391	29.4289	29.2795
	liver weight (g)	0.052	0.0488	0.0473	0.0538	0.0503	0.0532	0.051	0.0531	0.0525	0.0546	0.0525	0.0473	0.0493	0.0498	0.0545	0.0556	0.0541	0.0491	0.0528	0.0507
		total volume	0.2	ml		dilution	10		length	0.606061	cm		sample volume	0.02	ml		homogenate volume	0.25	ml
		NLD					NLD+BLEx					ALD					ALD+BLEx
		1	2	3	4	5	1	2	3	4	5	1	2	3	4	5	1	2	3	4	5
	ABS/min	0.00841429	0.0112857	0.00704762	0.0154476	0.0107429	0.0115524	0.00909524	0.00810476	0.0085619	0.00797619	0.012581	0.00971905	0.0106524	0.0100381	0.0136429	0.0121857	0.011981	0.00921905	0.00940952	0.0107048
	U/ml	0.220374	0.295578	0.18458	0.40458	0.281361	0.302562	0.238209	0.212268	0.22424	0.2089	0.329501	0.254546	0.278991	0.262902	0.357313	0.31915	0.313787	0.241451	0.24644	0.280363
	mU/mg protein	8.33437	10.5808	6.82644	13.4742	9.01183	9.7375	8.43695	7.85041	7.77764	7.59993	11.6704	8.73825	9.5774	8.7124	10.3547	10.5243	9.05418	8.92972	8.37409	9.57539
	U/g liver	1.05949	1.51423	0.975584	1.88002	1.39841	1.42182	1.16769	0.999377	1.06781	0.956503	1.56905	1.34538	1.41476	1.31979	1.63905	1.43503	1.45003	1.22939	1.16686	1.38246
	R^2	0.990392	0.992088	0.989817	0.9942	0.991162	0.989792	0.987377	0.992031	0.991191	0.985336	0.994349	0.996487	0.992576	0.99127	0.989415	0.987615	0.987963	0.987621	0.986145	0.983162
	mU/mg protein						U/g liver
		NLD	NLD+BLEx	ALD	ALD+BLEx			NLD	NLD + BLEx	ALD	ALD + BLEx
		8.33437	9.7375	11.6704	10.5243			1.05949	1.42182	1.56905	1.43503
		10.5808	8.43695	8.73825	9.05418			1.51423	1.16769	1.34538	1.45003
		6.82644	7.85041	9.5774	8.92972			0.975584	0.999377	1.41476	1.22939
		13.4742	7.77764	8.7124	8.37409			1.88002	1.06781	1.31979	1.16686
		9.01183	7.59993	10.3547	9.57539			1.39841	0.956503	1.63905	1.38246
	average	9.64554	8.28049	9.81063	9.29153		average	1.36555	1.12264	1.45761	1.33275
	s.d.	2.52989	0.872978	1.24149	0.810744		s.d.	0.365244	0.185295	0.140325	0.127369
	s.e.	1.1314	0.390408	0.555213	0.362576		s.e.	0.163342	0.0828665	0.0627554	0.0569612

## Sheet: ANOVA
		NLD					NLD+BLEx					ALD					ALD+BLEx
	min	1	2	3	4	5	1	2	3	4	5	1	2	3	4	5	1	2	3	4	5
	0	-0.0035	0.0135	0.0095	0.027	0.008	0.0115	0.0075	0.008	-0.002	0.01	0.01	0.011	0.01	0.012	0.012	0.0005	0.0175	0.018	0.014	0.0195
	3	0.0125	0.0365	0.0245	0.0635	0.032	0.036	0.0245	0.0265	0.0155	0.023	0.038	0.0375	0.0355	0.0335	0.0395	0.0235	0.0435	0.0385	0.0325	0.0375
	6	0.0355	0.0675	0.0425	0.1045	0.0585	0.0655	0.0485	0.0475	0.039	0.0435	0.073	0.063	0.0625	0.06	0.075	0.0545	0.0725	0.059	0.056	0.0645
	9	0.0625	0.103	0.0645	0.152	0.093	0.101	0.0765	0.072	0.065	0.071	0.111	0.092	0.0945	0.091	0.1175	0.094	0.109	0.0895	0.085	0.0985
	12	0.0905	0.1405	0.088	0.2025	0.129	0.141	0.1085	0.0995	0.094	0.098	0.154	0.123	0.131	0.1245	0.1645	0.136	0.1515	0.121	0.118	0.1375
	15	0.121	0.181	0.115	0.2585	0.1685	0.184	0.1425	0.1295	0.1255	0.127	0.197	0.158	0.17	0.162	0.215	0.181	0.197	0.156	0.1545	0.1775
	protein conc. (mg/ml)	26.4416	27.9352	27.0391	30.0263	31.2212	31.0719	28.234	27.0391	28.8314	27.4871	28.234	29.1301	29.1301	30.1757	34.5072	30.325	34.6566	27.0391	29.4289	29.2795
	liver weight (g)	0.052	0.0488	0.0473	0.0538	0.0503	0.0532	0.051	0.0531	0.0525	0.0546	0.0525	0.0473	0.0493	0.0498	0.0545	0.0556	0.0541	0.0491	0.0528	0.0507
		total volume	0.2	ml		dilution	10		length	0.606061	cm		sample volume	0.02	ml		homogenate volume	0.25	ml
		NLD					NLD+BLEx					ALD					ALD+BLEx
		1	2	3	4	5	1	2	3	4	5	1	2	3	4	5	1	2	3	4	5
	ABS/min	0.00841429	0.0112857	0.00704762	0.0154476	0.0107429	0.0115524	0.00909524	0.00810476	0.0085619	0.00797619	0.012581	0.00971905	0.0106524	0.0100381	0.0136429	0.0121857	0.011981	0.00921905	0.00940952	0.0107048
	U/ml	0.220374	0.295578	0.18458	0.40458	0.281361	0.302562	0.238209	0.212268	0.22424	0.2089	0.329501	0.254546	0.278991	0.262902	0.357313	0.31915	0.313787	0.241451	0.24644	0.280363
	mU/mg protein	8.33437	10.5808	6.82644	13.4742	9.01183	9.7375	8.43695	7.85041	7.77764	7.59993	11.6704	8.73825	9.5774	8.7124	10.3547	10.5243	9.05418	8.92972	8.37409	9.57539
	U/g liver	1.05949	1.51423	0.975584	1.88002	1.39841	1.42182	1.16769	0.999377	1.06781	0.956503	1.56905	1.34538	1.41476	1.31979	1.63905	1.43503	1.45003	1.22939	1.16686	1.38246
	R^2	0.990392	0.992088	0.989817	0.9942	0.991162	0.989792	0.987377	0.992031	0.991191	0.985336	0.994349	0.996487	0.992576	0.99127	0.989415	0.987615	0.987963	0.987621	0.986145	0.983162
		NLD	ALD
	control	1.05949	1.56905
		1.51423	1.34538
		0.975584	1.41476
		1.88002	1.31979
		1.39841	1.63905
	BLEx	1.42182	1.43503
		1.16769	1.45003
		0.999377	1.22939
		1.06781	1.16686
		0.956503	1.38246
two-way ANOVA
	data number	average	unbiased vatriance	s.d.	s.e.
control,NLD	5	1.36555	0.133403	0.365244	0.163342
control,ALD	5	1.45761	0.0196912	0.140325	0.0627554
BLEx,NLD	5	1.12264	0.0343343	0.185295	0.0828665
BLEx,ALD	5	1.33275	0.0162229	0.127369	0.0569612
control	10	1.41158	0.0703961	0.265323	0.0839024
BLEx	10	1.2277	0.034733	0.186368	0.0589347
NLD	10	1.24409	0.0909402	0.301563	0.0953626
ALD	10	1.39518	0.0202921	0.14245	0.0450468
total	20	1.31964	0.0586961	0.242273	0.0541738
ANOVA table
Variation factors	Sum of squared deviations	Degree of freedom	mean square	F value	P value	Ｆ(0.95)
Total variation	1.11523	19
Line spacing change	0.169064	1	0.169064	3.32066	0.0871588	4.494
Inter-row change	0.114135	1	0.114135	2.24177	0.153794	4.494
Interaction	0.0174206	1	0.0174206	0.342164	0.566741	4.494
Error variation	0.814606	16	0.0509129
