# Supplementary material for: Chronic intake of high-dose of blueberry leaf extract does not augment the harmful effects of ethanol in rats
Source: PeerJ. 2019 Jun 7;7:e6989. doi: 10.7717/peerj.6989 (PMC6557255; doi:10.7717/peerj.6989)
Supplement: Dataset S9 [file peerj-07-6989-s009.xlsx]

## Sheet: ALDH2-1
Relative Quantity Plots
ALDH2	Well ID/Replicate	Relative Quantity (∆R)
	1-ALDH2	1.97214
	2-ALDH2	1.12745
	3-ALDH2	1.34207
	5-ALDH2	0.989585
	6-ALDH2	1.72507
	7-ALDH2	1.89701
	9-ALDH2	1.06435
	10-ALDH2	0.921271
	11-ALDH2	1.08158
	13-ALDH2	1.66402
	14-ALDH2	1.37577
	15-ALDH2	1.17913
	16-ALDH2	1

## Sheet: ALDH2-2
Relative Quantity Plots
ALDH2	Well ID/Replicate	Relative Quantity (∆R)
	1-ALDH2	1.06691
	2-ALDH2	1.00199
	5-ALDH2	1.13187
	6-ALDH2	0.914111
	7-ALDH2	1
	9-ALDH2	1.14621
	10-ALDH2	1.1088
	12-ALDH2	1.1053
	13-ALDH2	0.831547

## Sheet: ALDH2 mRNA
		NLD	NLD+BLEx	ALD	ALD+BLEx
		1.97214	0.989585	1.06435	1.66402
		1.12745	1.72507	0.921271	1.37577
		1.34207	1.89701	1.08158	1.17913
		1.06691	1.13187	1.14621	1.1053
		1.00199	0.914111	1.1088	0.831547
	average	1.30211	1.33153	1.06444	1.23115
	relative
		NLD	NLD + BLEx	ALD	ALD + BLEx
		1.51457	0.759984	0.817401	1.27794
		0.865863	1.32482	0.70752	1.05657
		1.03069	1.45687	0.830635	0.905547
		0.819371	0.869259	0.880271	0.848851
		0.76951	0.702021	0.851538	0.638613
	average	1	1.02259	0.817473	0.945504
	s.d.	0.303919	0.344667	0.0658919	0.238731
	s.e.	0.135917	0.15414	0.0294678	0.106764

## Sheet: ANOVA
		NLD	NLD+BLEx	ALD	ALD+BLEx
		1.97214	0.989585	1.06435	1.66402
		1.12745	1.72507	0.921271	1.37577
		1.34207	1.89701	1.08158	1.17913
		1.06691	1.13187	1.14621	1.1053
		1.00199	0.914111	1.1088	0.831547
	average	1.30211	1.33153	1.06444	1.23115
	relative
		NLD	ALD
	control	1.51457	0.817401
		0.865863	0.70752
		1.03069	0.830635
		0.819371	0.880271
		0.76951	0.851538
	BLEx	0.759984	1.27794
		1.32482	1.05657
		1.45687	0.905547
		0.869259	0.848851
		0.702021	0.638613
two-way ANOVA
	data number	average	unbiased vatriance	s.d.	s.e.
control,NLD	5	1	0.0923669	0.303919	0.135917
control,ALD	5	0.817473	0.00434175	0.0658919	0.0294678
BLEx,NLD	5	1.02259	0.118795	0.344667	0.15414
BLEx,ALD	5	0.945504	0.0569923	0.238731	0.106764
control	10	0.908737	0.0522361	0.228552	0.0722745
BLEx	10	0.984048	0.0797785	0.282451	0.0893188
NLD	10	1.0113	0.0939916	0.306581	0.0969493
ALD	10	0.881488	0.0318128	0.178362	0.0564029
total	20	0.946392	0.0640258	0.253033	0.0565799
ANOVA table
Variation factors	Sum of squared deviations	Degree of freedom	mean square	F value	P value	Ｆ(0.95)
Total variation	1.21649	19
Line spacing change	0.0283587	1	0.0283587	0.41628	0.527943	4.494
Inter-row change	0.0842497	1	0.0842497	1.23671	0.282537	4.494
Interaction	0.0138967	1	0.0138967	0.203992	0.65758	4.494
Error variation	1.08998	16	0.0681241
