# Supplementary material for: Chronic intake of high-dose of blueberry leaf extract does not augment the harmful effects of ethanol in rats
Source: PeerJ. 2019 Jun 7;7:e6989. doi: 10.7717/peerj.6989 (PMC6557255; doi:10.7717/peerj.6989)
Supplement: Dataset S11 [file peerj-07-6989-s011.xlsx]

## Sheet: 20180909-CYP2E1-1
	Name	Volume	Volume + Background	Background	Background Level	Background Type	Median Intensity	Average Intensity	Mode Intensity	Std Dev	Variance	Min Intensity	Max Intensity	Percent	Area > Background	Centre X	Centre Y	Width	Height	Area	Comment
1	1	554813	2592179	2.03737e+06	1039.47	Shape 13	1165	1322.54	1076	321.46	103337	1009	2457	1.47	1926	360	527	70	28	1960
2	2	895101	2932467	2.03737e+06	1039.47	Shape 13	1242.5	1496.16	1068	522.76	273276	1028	3378	2.38	1950	436	528	70	28	1960
3	3	1.46774e+06	3505107	2.03737e+06	1039.47	Shape 13	1379	1788.32	1113	836.28	699357	1035	4462	3.89	1959	515	525	70	28	1960
4	4	2.7227e+06	4760061	2.03737e+06	1039.47	Shape 13	1611	2428.6	1157	1604.79	2.57534e+06	1020	6894	7.22	1958	585	524	70	28	1960
5	5	2.85002e+06	4887384	2.03737e+06	1039.47	Shape 13	1672	2493.56	1194	1619.85	2.62393e+06	1050	6697	7.56	1960	654	524	70	28	1960
6	6	2.46864e+06	4506004	2.03737e+06	1039.47	Shape 13	1737	2298.98	1158	1241.19	1.54055e+06	1025	5519	6.55	1958	730	520	70	28	1960
7	7	3.24385e+06	5281212	2.03737e+06	1039.47	Shape 13	1747.5	2694.5	1166	1956.59	3.82824e+06	1063	9723	8.61	1960	802	516	70	28	1960
8	8	6.28174e+06	8319110	2.03737e+06	1039.47	Shape 13	2321	4244.44	1224	3777.42	1.42689e+07	1057	15724	16.67	1960	870	515	70	28	1960
9	9	4.68349e+06	6720852	2.03737e+06	1039.47	Shape 13	2101.5	3429.01	1246	2730.26	7.45435e+06	1074	11665	12.43	1960	939	513	70	28	1960
10	10	3.90551e+06	5942879	2.03737e+06	1039.47	Shape 13	1837.5	3032.08	1129	2425.52	5.88314e+06	1052	12067	10.36	1960	1013	512	70	28	1960
11	11	4.97462e+06	7011987	2.03737e+06	1039.47	Shape 13	2240	3577.54	1161	2793.04	7.80109e+06	1072	12697	13.2	1960	1086	510	70	28	1960
12	12	3.63922e+06	5676586	2.03737e+06	1039.47	Shape 13	1963	2896.22	1162	2016.62	4.06675e+06	1052	8862	9.66	1960	1159	507	70	28	1960

## Sheet: 20180911-CYP2E1-2
	Name	Volume	Volume + Background	Background	Background Level	Background Type	Median Intensity	Average Intensity	Mode Intensity	Std Dev	Variance	Min Intensity	Max Intensity	Percent	Area > Background	Centre X	Centre Y	Width	Height	Area	Comment
1	1	2.83497e+06	5532298	2.69733e+06	1043.86	Shape 9	1527.5	2140.98	1102	1227.44	1.50662e+06	1039	6468	8.38	2583	530	479	76	34	2584
2	2	2.89461e+06	5591934	2.69733e+06	1043.86	Shape 9	1401	2164.06	1090	1444.18	2.08566e+06	1022	7076	8.56	2574	604	480	76	34	2584
3	3	3.43533e+06	6132658	2.69733e+06	1043.86	Shape 9	1548	2373.32	1173	1586.84	2.51807e+06	1023	7147	10.16	2577	678	482	76	34	2584
4	4	1.80337e+06	4500697	2.69733e+06	1043.86	Shape 9	1354	1741.76	1160	794.54	631296	1023	4464	5.33	2582	751	482	76	34	2584
5	5	5.96268e+06	8660007	2.69733e+06	1043.86	Shape 9	1794.5	3351.4	1101	3291.64	1.08349e+07	1047	14843	17.63	2584	820	482	76	34	2584
6	6	7.37002e+06	10067345	2.69733e+06	1043.86	Shape 9	1978	3896.03	1227	3705.22	1.37286e+07	1106	15947	21.79	2584	888	483	76	34	2584
7	7	4.55615e+06	7253475	2.69733e+06	1043.86	Shape 9	1710	2807.07	1154	2198.82	4.8348e+06	1067	10112	13.47	2584	962	486	76	34	2584
8	8	4.96231e+06	7659635	2.69733e+06	1043.86	Shape 9	1965	2964.26	1186	2130.38	4.53852e+06	1064	9299	14.67	2584	1042	488	76	34	2584

## Sheet: CYP2E1 protein
		NLD	NLD+BLEx	ALD	ALD+BLEx
		554813	2.7227e+06	3.24385e+06	3.90551e+06
		895101	2.85002e+06	6.28174e+06	4.97462e+06
		1.46774e+06	2.46864e+06	4.68349e+06	3.63922e+06
		2.83497e+06	3.43533e+06	5.96268e+06	4.55615e+06
		2.89461e+06	1.80337e+06	7.37002e+06	4.96231e+06
	average	1.72945e+06	2.65601e+06	5.50836e+06	4.40756e+06
	relative
		NLD	NLD + BLEx	ALD	ALD + BLEx
		0.320804	1.57432	1.87565	2.25824
		0.517565	1.64794	3.63223	2.87642
		0.848676	1.42741	2.70808	2.10427
		1.63924	1.98638	3.44774	2.63445
		1.67372	1.04274	4.26149	2.8693
	average	1	1.53576	3.18504	2.54854
	s.d.	0.628385	0.343485	0.917838	0.353351
	s.e.	0.281022	0.153611	0.410469	0.158023

## Sheet: ANOVA
		NLD	NLD+BLEx	ALD	ALD+BLEx
		554813	2.7227e+06	3.24385e+06	3.90551e+06
		895101	2.85002e+06	6.28174e+06	4.97462e+06
		1.46774e+06	2.46864e+06	4.68349e+06	3.63922e+06
		2.83497e+06	3.43533e+06	5.96268e+06	4.55615e+06
		2.89461e+06	1.80337e+06	7.37002e+06	4.96231e+06
	average	1.72945e+06	2.65601e+06	5.50836e+06	4.40756e+06
	relative
		NLD	ALD
	control	0.320804	1.87565
		0.517565	3.63223
		0.848676	2.70808
		1.63924	3.44774
		1.67372	4.26149
	BLEx	1.57432	2.25824
		1.64794	2.87642
		1.42741	2.10427
		1.98638	2.63445
		1.04274	2.8693
two-way ANOVA
	data number	average	unbiased vatriance	s.d.	s.e.
control,NLD	5	1	0.394867	0.628385	0.281022
control,ALD	5	3.18504	0.842426	0.917838	0.410469
BLEx,NLD	5	1.53576	0.117982	0.343485	0.153611
BLEx,ALD	5	2.54854	0.124857	0.353351	0.158023
control	10	2.09252	1.87613	1.36972	0.433143
BLEx	10	2.04215	0.392852	0.626779	0.198205
NLD	10	1.26788	0.307665	0.554676	0.175404
ALD	10	2.86679	0.54244	0.736505	0.232903
total	20	2.06733	1.07545	1.03704	0.231889
ANOVA table
Variation factors	Sum of squared deviations	Degree of freedom	mean square	F value	P value	Ｆ(0.95)
Total variation	20.4335	19
Line spacing change	0.0126863	1	0.0126863	0.0342843	0.85543	4.494
Inter-row change	12.7826	1	12.7826	34.5444	2.33736e-05	4.494
Interaction	1.71773	1	1.71773	4.64211	0.0467801	4.494
Error variation	5.92053	16	0.370033

## Sheet: tukey
one-way ANOVA								Result of multiple comparison
								Tukey-Kramer
										Level of significance (1%)	Level of significance (5%)		0.05	0.01
	data number	average	unbiased vatriance	s.d.	s.e.				The difference between the average	Rejection value	Rejection value	test statistic	Reference point	Reference point
NLD	5	1	0.394867	0.628385	0.281022			NLD,NLD+BLEx	-0.535757	1.10071	1.41241	-1.39257	2.86102	3.67123
NLD+BLEx	5	1.53576	0.117982	0.343485	0.153611			NLD,ALD	-2.18504	1.10071	1.41241	-5.67948	2.86102	3.67123	**
ALD	5	3.18504	0.842426	0.917838	0.410469			NLD,ALD+BLEx	-1.54854	1.10071	1.41241	-4.02505	2.86102	3.67123	**
ALD+BLEx	5	2.54854	0.124857	0.353351	0.158023			NLD+BLEx,ALD	-1.64928	1.10071	1.41241	-4.28691	2.86102	3.67123	**
								NLD+BLEx,ALD+BLEx	-1.01278	1.10071	1.41241	-2.63248	2.86102	3.67123
total	20	2.06733	1.07545	1.03704	0.231889			ALD,ALD+BLEx	0.6365	1.10071	1.41241	1.65443	2.86102	3.67123
ANOVA table
Variation factors	Sum of squared deviations	Degree of freedom	mean square	F value	P value	Ｆ(0.95)	Ｆ(0.99)
Total variation	20.4335	19
Variation betseen subgroup	14.513	3	4.83766	13.0736	0.00014287	3.23887	5.29221
Error variation	5.92053	16	0.370033
