# Supplementary material for: Chronic intake of high-dose of blueberry leaf extract does not augment the harmful effects of ethanol in rats
Source: PeerJ. 2019 Jun 7;7:e6989. doi: 10.7717/peerj.6989 (PMC6557255; doi:10.7717/peerj.6989)
Supplement: Dataset S13 [file peerj-07-6989-s013.xlsx]

## Sheet: 20180827-carbonyl-1
	Name	Volume	Volume + Background	Background	Background Level	Background Type	Median Intensity	Average Intensity	Mode Intensity	Std Dev	Variance	Min Intensity	Max Intensity	Percent	Area > Background	Centre X	Centre Y	Width	Height	Area	Comment
1	1	8.68632e+07	127118493	4.02553e+07	1046.79	Shape 13	2758	3305.56	1097	2030.54	4.12311e+06	1024	8302	8.42	38374	349	464	92	418	38456
2	2	9.04711e+07	121100120	3.0629e+07	1046.79	Shape 13	4360	4138.76	1107	2063.27	4.25708e+06	1049	8931	8.77	29260	429	464	70	418	29260
3	3	8.21146e+07	112743672	3.0629e+07	1046.79	Shape 13	4252	3853.17	1141	1737.25	3.01805e+06	1068	8002	7.96	29260	501	465	70	418	29260
4	4	9.01601e+07	120789185	3.0629e+07	1046.79	Shape 13	4183	4128.13	1159	1839.08	3.3822e+06	1096	8728	8.74	29260	572	464	70	418	29260
5	5	8.36445e+07	114273559	3.0629e+07	1046.79	Shape 13	3813	3905.45	1179	1647.98	2.71582e+06	1131	8624	8.11	29260	643	461	70	418	29260
6	6	8.81724e+07	118801478	3.0629e+07	1046.79	Shape 13	4517	4060.2	1183	1729.52	2.99125e+06	1134	9254	8.55	29260	713	455	70	418	29260
7	7	9.39713e+07	124600323	3.0629e+07	1046.79	Shape 13	4352	4258.38	1206	2101.13	4.41473e+06	1132	10034	9.11	29260	785	452	70	418	29260
8	8	1.16233e+08	146862434	3.0629e+07	1046.79	Shape 13	5512	5019.22	1156	2353.2	5.53754e+06	1117	10151	11.27	29260	856	458	70	418	29260
9	9	7.27638e+07	103392790	3.0629e+07	1046.79	Shape 13	3338	3533.59	1150	1600.33	2.56106e+06	1096	8299	7.05	29260	928	451	70	418	29260
10	10	7.09499e+07	101578943	3.0629e+07	1046.79	Shape 13	3037	3471.6	1132	1700.47	2.89161e+06	1067	7683	6.88	29260	998	450	70	418	29260
11	11	6.9535e+07	100164087	3.0629e+07	1046.79	Shape 13	2788	3423.24	1102	1884.55	3.55151e+06	1041	8329	6.74	29258	1068	450	70	418	29260
12	12	8.68005e+07	127930938	4.11304e+07	1046.79	Shape 13	2708	3255.9	1088	2015.15	4.06082e+06	1023	7965	8.41	39146	1152	452	94	418	39292

## Sheet: 20180827-carbonyl-2
	Name	Volume	Volume + Background	Background	Background Level	Background Type	Median Intensity	Average Intensity	Mode Intensity	Std Dev	Variance	Min Intensity	Max Intensity	Percent	Area > Background	Centre X	Centre Y	Width	Height	Area	Comment
1	1	9.27988e+07	126305314	3.35066e+07	1064.51	Shape 9	3546.5	4012.75	1341	2164.13	4.68345e+06	1081	9630	12.8	31476	432	545	86	366	31476
2	2	1.09443e+08	136715426	2.72728e+07	1064.51	Shape 9	5638.5	5336.28	1373	2354.03	5.54144e+06	1198	11034	15.1	25620	510	540	70	366	25620
3	3	1.04858e+08	132130831	2.72728e+07	1064.51	Shape 9	5352	5157.33	7268	1993.81	3.97526e+06	1187	9169	14.47	25620	580	541	70	366	25620
4	4	9.60702e+07	123342926	2.72728e+07	1064.51	Shape 9	4975	4814.32	5177	1795.89	3.22522e+06	1219	8283	13.26	25620	652	544	70	366	25620
5	5	7.77389e+07	105011686	2.72728e+07	1064.51	Shape 9	4069	4098.82	1731	1569.8	2.46427e+06	1218	7873	10.73	25620	721	541	70	366	25620
6	6	8.45127e+07	111785459	2.72728e+07	1064.51	Shape 9	4103	4363.21	7042	1858.41	3.45368e+06	1219	8255	11.66	25620	797	539	70	366	25620
7	7	7.20346e+07	99307418	2.72728e+07	1064.51	Shape 9	3766	3876.17	3411	1581.93	2.50251e+06	1159	7468	9.94	25620	869	536	70	366	25620
8	8	8.73257e+07	130182944	4.28572e+07	1064.51	Shape 9	2961	3233.56	1247	1794.08	3.21871e+06	1078	7188	12.05	40260	958	541	110	366	40260

## Sheet: carbonyl protein
		NLD	NLD+BLEx	ALD	ALD+BLEx
		8.68632e+07	9.01601e+07	9.39713e+07	7.09499e+07
		9.04711e+07	8.36445e+07	1.16233e+08	6.9535e+07
		8.21146e+07	8.81724e+07	7.27638e+07	8.68005e+07
		9.27988e+07	1.04858e+08	7.77389e+07	7.20346e+07
		1.09443e+08	9.60702e+07	8.45127e+07	8.73257e+07
	average	9.23381e+07	9.25811e+07	8.9044e+07	7.73292e+07
	relative
		NLD	NLD + BLEx	ALD	ALD + BLEx
		0.940708	0.976414	1.01769	0.768371
		0.979781	0.905851	1.25878	0.753049
		0.889283	0.954887	0.788015	0.94003
		1.00499	1.13559	0.841895	0.780119
		1.18524	1.04042	0.915253	0.945718
	average	1	1.00263	0.964326	0.837457
	s.d.	0.112384	0.0886549	0.185765	0.0967301
	s.e.	0.0502598	0.0396477	0.0830766	0.043259

## Sheet: ANOVA
		NLD	NLD+BLEx	ALD	ALD+BLEx
		8.68632e+07	9.01601e+07	9.39713e+07	7.09499e+07
		9.04711e+07	8.36445e+07	1.16233e+08	6.9535e+07
		8.21146e+07	8.81724e+07	7.27638e+07	8.68005e+07
		9.27988e+07	1.04858e+08	7.77389e+07	7.20346e+07
		1.09443e+08	9.60702e+07	8.45127e+07	8.73257e+07
	average	9.23381e+07	9.25811e+07	8.9044e+07	7.73292e+07
	relative
		NLD	ALD
	control	0.940708	1.01769
		0.979781	1.25878
		0.889283	0.788015
		1.00499	0.841895
		1.18524	0.915253
	BLEx	0.976414	0.768371
		0.905851	0.753049
		0.954887	0.94003
		1.13559	0.780119
		1.04042	0.945718
two-way ANOVA
	data number	average	unbiased vatriance	s.d.	s.e.
control,NLD	5	1	0.0126302	0.112384	0.0502598
control,ALD	5	0.964326	0.0345086	0.185765	0.0830766
BLEx,NLD	5	1.00263	0.00785969	0.0886549	0.0396477
BLEx,ALD	5	0.837457	0.0093567	0.0967301	0.043259
control	10	0.982163	0.0213041	0.145959	0.0461564
BLEx	10	0.920044	0.0152302	0.123411	0.0390259
NLD	10	1.00132	0.00910856	0.0954388	0.0301804
ALD	10	0.900892	0.0239667	0.154812	0.0489558
total	20	0.951104	0.0183212	0.135356	0.0302665
ANOVA table
Variation factors	Sum of squared deviations	Degree of freedom	mean square	F value	P value	Ｆ(0.95)
Total variation	0.348103	19
Line spacing change	0.0192937	1	0.0192937	1.1992	0.289693	4.494
Inter-row change	0.0504251	1	0.0504251	3.13417	0.0957156	4.494
Interaction	0.020963	1	0.020963	1.30296	0.270471	4.494
Error variation	0.257421	16	0.0160888
